# Supplementary material for: Taking an integrated knowledge translation approach in research to develop the CONSORT-Equity 2017 reporting guideline: an observational study
Source: PubMed Central journal article supplement — BMJ Open. 2019 Jul 30;9(7):e026866. doi: 10.1136/bmjopen-2018-026866 (PMC6678066; doi:10.1136/bmjopen-2018-026866), 2019-07-30
Supplement: bmjopen-2018-026866.draft_revisions.pdf [file bmjopen-2018-026866.draft_revisions.pdf]

# BMJ Open

BMJ Open is committed to open peer review. As part of this commitment we make the peer review history of every article we publish publicly available.

When an article is published we post the peer reviewers' comments and the authors' responses online. We also post the versions of the paper that were used during peer review. These are the versions that the peer review comments apply to.

The versions of the paper that follow are the versions that were submitted during the peer review process. They are not the versions of record or the final published versions. They should not be cited or distributed as the published version of this manuscript.

BMJ Open is an open access journal and the full, final, typeset and author-corrected version of record of the manuscript is available on our site with no access controls, subscription charges or pay-per-view fees (<http://bmjopen.bmj.com>).

If you have any questions on BMJ Open's open peer review process please email [info.bmjopen@bmj.com](mailto:info.bmjopen@bmj.com)

# BMJ Open

## Taking an integrated knowledge translation approach in research to develop a reporting guideline: The example of CONSORT-Equity 2017

|                               |                                                                                                                                                                                                                                                                                                                                                                                                                                                                                                                                                                     |
|-------------------------------|---------------------------------------------------------------------------------------------------------------------------------------------------------------------------------------------------------------------------------------------------------------------------------------------------------------------------------------------------------------------------------------------------------------------------------------------------------------------------------------------------------------------------------------------------------------------|
| Journal:                      | <i>BMJ Open</i>                                                                                                                                                                                                                                                                                                                                                                                                                                                                                                                                                     |
| Manuscript ID                 | bmjopen-2018-026866                                                                                                                                                                                                                                                                                                                                                                                                                                                                                                                                                 |
| Article Type:                 | Research                                                                                                                                                                                                                                                                                                                                                                                                                                                                                                                                                            |
| Date Submitted by the Author: | 27-Sep-2018                                                                                                                                                                                                                                                                                                                                                                                                                                                                                                                                                         |
| Complete List of Authors:     | Jull, Janet; Queen's University, School of Rehabilitation Therapy; Ottawa Hospital Research Institute, Graham, Ian; Ottawa Hospital Research Institute, Kristjansson, Elizabeth; University of Ottawa, Institute of Population Health Moher, David; Ottawa Hospital Research Institute, Ottawa Methods Centre Petkovic, Jennifer; University of Ottawa, Bruyere Research Institute Yoganathan, Manosila; Elisabeth Bruyere Research Institute Tugwell, Peter; University of Ottawa, medicine Welch, Vivian A.; University of Ottawa, Institute of Population Health |
| Keywords:                     | health equity, reporting guidelines, CONSORT, integrated knowledge translation, collaborative research, research co-production                                                                                                                                                                                                                                                                                                                                                                                                                                      |
|                               |                                                                                                                                                                                                                                                                                                                                                                                                                                                                                                                                                                     |

SCHOLARONE™  
Manuscripts

Peer Review Only

1  
2  
3 **Title:** Taking an integrated knowledge translation approach in research to develop a reporting  
4 guideline: The example of CONSORT-Equity 2017  
5  
6  
7

8 Janet Jull

9  
10 Assistant Professor, School of Rehabilitation Therapy, Queens University, Kingston, Ontario,  
11 Canada; Affiliate Investigator, Ottawa Hospital Research Institute, Ottawa, Ontario, Canada  
12 [janet.jull@queensu.ca](mailto:janet.jull@queensu.ca)  
13

14  
15 Ian D Graham

16 Senior Scientist, Clinical Epidemiology Program, Ottawa Hospital Research Institute; Professor,  
17 Department of Epidemiology and Community Medicine, University of Ottawa, Ottawa, Ontario,  
18 Canada  
19 [igraham@ohri.ca](mailto:igraham@ohri.ca)  
20  
21

22  
23 Elizabeth Kristjansson

24 Associate Professor, Centre for Research on Educational and Community Services, School of  
25 Psychology, University of Ottawa, Ottawa, Ontario, Canada  
26 [kristjan@uottawa.ca](mailto:kristjan@uottawa.ca)  
27  
28

29  
30 David Moher

31 Senior Scientist, Clinical Epidemiology Program, Ottawa Hospital Research Institute, Ottawa,  
32 Ontario, Canada; Associate Professor, School of Epidemiology, Public Health and Preventive  
33 Medicine, University of Ottawa, Ottawa, Ontario, Canada.  
34 [dmoher@ohri.ca](mailto:dmoher@ohri.ca)  
35  
36

37  
38 Jennifer Petkovic

39 Coordinator, Campbell and Cochrane Equity Methods Group, Bruyère Research Institute,  
40 Bruyère Continuing Care and University of Ottawa, Ottawa, Ontario, Canada  
41 [jennifer.petkovic@uottawa.ca](mailto:jennifer.petkovic@uottawa.ca)  
42  
43

44  
45 Manosila Yoganathan

46 Coordinator, Bruyère Research Institute, Bruyère Continuing Care and University of Ottawa,  
47 Ottawa, Ontario, Canada  
48 [myoganathan@bruyere.org](mailto:myoganathan@bruyere.org)  
49  
50

51  
52 Peter Tugwell

53 Senior Scientist, Clinical Epidemiology Program, Ottawa Hospital Research Institute, Ottawa,  
54 Ontario, Canada; Professor, Department of Medicine, Faculty of Medicine, University of Ottawa,  
55  
56  
57  
58  
59

Ottawa, Ontario, Canada; Professor, School of Epidemiology and Public Health, Faculty of  
Medicine, University of Ottawa, Ottawa, Ontario, Canada  
ptugwell@uottawa.ca

Vivian Welch

Scientist, Methods Centre, Bruyère Research Institute, Bruyère Continuing Care and University  
of Ottawa, Ottawa, Ontario, Canada,  
vwelch@campbellcollaboration.org

AND

Members of the CONSORT-Equity 2017 and Boston Equity Symposium.

### **Acknowledgements**

Collaborating authors who are identified as a member of the CONSORT Equity and Boston  
Equity Symposium participants are as follows: Rebecca Armstrong, Sarah Baird, Yvonne Boyer,  
Luis Gabriel Cuervo, Regina Greer-Smith, Anne Lyddiatt, Jessie McGowan, Lawrence  
Mbuagbaw, Tomas Pantoja, Beverly Shea, Bjarne Robberstad, Howard White, George Wells.

We thank the following individuals for their support and encouragement: Mark Petticrew,  
Jeremy Grimshaw, Charles Weijer, Monica Taljaard, Yukiko Asada.

**Corresponding Author:** Dr. Janet Jull, janet.jull@queensu.ca

### **Abstract**

#### **Introduction**

Reporting guidelines in health research improve and contribute to an evidence base for health  
systems decision-making. An integrated knowledge translation (KT) approach engages  
knowledge users, meaning those whom the research is meant to benefit, with researchers. The  
aim of this paper is to describe the use of an integrated KT approach to develop a reporting  
guideline for health equity, CONSORT-Equity 2017.

#### **Methods**

A mixed-method study that used an integrated KT approach was conducted to enhance the  
integration of knowledge user views in six study phases of reporting guideline development.  
Each study phase was governed by a group of researchers in collaboration with an advisory  
board populated by knowledge users in an advisory board-researcher collaboration. The 38  
member advisory board-researcher collaboration was surveyed for their perceptions of the  
integrated KT approach.

#### **Results**

We describe two essential study stages 1) Establish guiding features, and 2) Engage in research  
actions. For the first stage there were four key steps: find common ground, form an advisory

1  
2  
3 board, commit to ethical guidance, and clarify theoretical perspective. The second stage was a  
4 multi-phase study bound by the agreed-upon guiding features of the research approach. There  
5 were 25 respondents on the advisory board-researcher member survey that reports perceptions of  
6 the integrated KT approach. The limitations of the integrated KT approach include those of  
7 work, time, distance and communication constraints for knowledge users; strengths include that  
8 the integrated KT approach made it possible to build research relationships that include a range  
9 of knowledge users.  
10

### 11 **Conclusions**

12 We describe a process designed to engage knowledge users with researchers to co-create  
13 knowledge, in ways that both are likely to define as useful, relevant and applicable. Further work  
14 is needed to examine the use of an integrated KT approach in reporting guideline development.  
15  
16  
17  
18  
19

### 20 **Strengths and limitations of this study**

- 21 • Reporting guidelines in health research improve and contribute to a robust evidence base  
22 for health systems decision-making
- 23 • Integrated knowledge translation (integrated KT) is an approach to research that  
24 structures the engagement of knowledge users, meaning those for whom the research is  
25 meant to ultimately be of use, with researchers in the co-creation of knowledge
- 26 • An integrated KT approach was used to engage knowledge users with researchers to  
27 develop the CONSORT-Equity 2017 reporting guideline
- 28 • A limitation is that the use of an integrated KT approach includes the challenges of work,  
29 time, distance and communication constraints for a group of people who hold a range of  
30 views, and who are collaborating to achieve study objectives
- 31 • An integrated KT approach was found to foster research study processes that prompt  
32 deliberation and consensus building among team members in the co-creation of  
33 knowledge, and establishes a knowledge base that knowledge users and researchers  
34 define as relevant, useful and applicable  
35  
36  
37  
38  
39  
40  
41  
42  
43  
44  
45  
46  
47  
48  
49  
50  
51  
52  
53  
54  
55  
56  
57  
58  
59  
60

## INTRODUCTION

Reporting guidelines in health research are important, as they improve and contribute to a more robust evidence base for health systems decision-making. The use of reporting guidelines in health research may improve completeness and transparency of reported evidence from research studies. Further, their importance is reflected in international research policies to deliver impactful research (1, 2). There is a significant amount of avoidable waste in research (3), meaning that potentially useful research findings are disregarded because of inadequate reporting, which better reporting guidelines can help address. Reporting guidelines can also be useful in clarifying how the research was performed, helping to make research more transparent and reproducible. “Integrated knowledge translation” (integrated KT) has been proposed as an approach to address the issues of knowledge production and application (4, 5). Potential guideline knowledge users, meaning those for whom the research is meant to ultimately be of use, may include people from a broad range of disciplines, including patients and members of the public, who are involved in a range of research-related activities. We describe the integrated KT approach designed to engage potential guideline knowledge users with researchers. The participating knowledge users and researchers were interested in better guidance for reporting randomized controlled trials that indicate health equity; specifically, by developing the reporting guideline CONSORT-Equity 2017. An integrated KT approach fosters research study processes that prompts deliberation and consensus building among team members in the co-creation of knowledge, and establishes a knowledge base that knowledge users and researchers define as relevant, useful and applicable.

Potential users of reporting guidelines (“knowledge users”) may include people from disciplines such as clinical epidemiology, economics, social science, public health, international development, knowledge translation and patients or patient organizations (“patients”) and

1  
2  
3 members of the public. Knowledge users may be involved in a range of research-related  
4  
5 activities, such as research funding, -development, -conduct, -participation, -dissemination, or  
6  
7 use of its outcomes for research or making health care decisions. We describe the process  
8  
9 designed to engage a group of knowledge users and researchers, who were all interested in better  
10  
11 guidance for reporting of randomized controlled trials for health equity. Furthermore, in the  
12  
13 process we sought to establish a knowledge base that knowledge users and researchers consider  
14  
15 relevant, useful and applicable, and in our example, to support health-equity relevant and focused  
16  
17 decision making. In this article, we summarize methods used for engagement of reporting  
18  
19 guideline knowledge users with researchers. We report on the perceptions, challenges and  
20  
21 strengths in the use of an integrated KT approach for the development of CONSORT-Equity  
22  
23  
24  
25  
26 2017.

### 27 28 **Development of a reporting guideline and knowledge translation**

29  
30 Striving for health equity is a matter of social justice and implies that everyone can attain  
31  
32 their health potential and that no one is disadvantaged by their social positioning or other socially  
33  
34 determined circumstances (6). Randomized controlled trials (“randomized trials”) are a powerful  
35  
36 design for determining the relative impact of an intervention (7). Nevertheless, for trials to  
37  
38 contribute effectively to policies that promote health equity, there remain challenges to overcome  
39  
40 (8). For example, poor reporting of equity considerations in trials can have undesired effects on  
41  
42 health systems’ organizational practices and policies, clinical and public care. Additionally, some  
43  
44 interventions can even aggravate and/or undermine health equity (9). Reporting guidelines are  
45  
46 needed to support the consideration of equity in the conduct of and communication about  
47  
48 randomized trials. While the involvement of knowledge users has been identified as important  
49  
50 for clinical guideline development (10, 11), a recent review of clinical guidelines show that there  
51  
52  
53  
54  
55  
56  
57  
58  
59  
60

1  
2  
3 is evidence for low levels of such involvement (12). Achieving consensus among collaborators  
4 on how to report research has been identified as important (13), but there is little information on  
5 how consensus can be approached through involvement of inter-disciplinary knowledge users  
6 that include patients and members of the public.  
7  
8  
9  
10

11  
12 “Knowledge translation” (KT) is a term used to refer to processes that bridge the “know-  
13 do” gap, and has been defined as the gap between what is learned from research and the  
14 implementation by knowledge users, with the aim to improve health delivery systems and health  
15 outcomes (14). Understandings of the know-do gap continue to evolve, and today the know-do  
16 gap is not seen solely as a problem of knowledge transfer, but also as a knowledge production  
17 problem. In other words, addressing the know-do gap requires researchers to begin thinking of  
18 KT before knowledge is created (4, 5). “Integrated knowledge translation” (integrated KT) has  
19 been proposed as an approach that is more likely to lead to the practical application of  
20 knowledge (15, 16) Integrated KT involves a collaborative approach between researchers and  
21 knowledge users in the research process to foster and promote inclusion of a range of  
22 perspectives (16). This can include developing the research question(s), making joint decisions  
23 about methodology and methods, involvement in data collection and tool development,  
24 interpretation of findings, and participation in the dissemination of findings (17). The integrated  
25 KT process requires that researchers and knowledge users collaborate to address an issue of  
26 mutual concern, recognize that each party brings knowledge and values to the research, and that  
27 they share a common focus on generation of knowledge for the purpose of its application.  
28  
29  
30  
31  
32  
33  
34  
35  
36  
37  
38  
39  
40  
41  
42  
43  
44  
45  
46  
47  
48

### 49 **The guideline development example: CONSORT Equity 2017**

50  
51 The internationally recognized Consolidated Standards for Reporting Trials (CONSORT)  
52 statement is an evidence-based guideline consisting of 25 items to encourage completeness and  
53  
54  
55  
56  
57  
58  
59  
60



1  
2  
3 transparency in reporting of randomized trials (18). An equity extension of CONSORT,  
4 “CONSORT-Equity 2017”, was proposed to influence the reporting of future trials (19). Uptake  
5 of CONSORT-Equity 2017 is critical to improve the reporting of trials that contribute health  
6 equity-relevant evidence (20). When we developed the CONSORT-Equity 2017, we considered  
7 it essential to form partnerships with different types of potential knowledge users, and therefore  
8 invited individuals who might be users of the research evidence generated in randomized trials to  
9 be involved in a range of research activities. An integrated KT approach was used to foster the  
10 development of CONSORT-Equity 2017.  
11  
12  
13  
14  
15  
16  
17  
18  
19  
20

21 During the development of CONSORT-Equity 2017, potential knowledge users were  
22 identified to include people from a range of disciplines; including clinical epidemiology, social  
23 science, public health, international development, patients or members of patient organizations;  
24 and who identify themselves as involved in the funding, development, conduct, participation,  
25 dissemination, or use of outcomes from randomized trials. In this paper, we describe the process  
26 of engaging these knowledge users with researchers in ways that contribute to equity-focused  
27 decision making. The aim of this paper is to describe the use of an integrated KT approach to  
28 develop a reporting guideline, CONSORT-Equity 2017.  
29  
30  
31  
32  
33  
34  
35  
36  
37  
38  
39

## 40 **METHODS**

41  
42 A mixed-method study that used integrated KT was conducted to enhance the integration  
43 of knowledge user views in guideline development (19). It included the following six study  
44 phases, based on the guidance for the development of reporting guidelines: (i) identification of  
45 the need for the guideline, (ii) review of the literature, (iii) identification of participants, (iv) the  
46 conduct of a Delphi study, (v) a face-to-face consensus meeting (13) and (vi) consultation with  
47 key informants (19). In addition, each phase of the study was governed by a group of researchers  
48  
49  
50  
51  
52  
53  
54  
55  
56  
57  
58  
59  
60

1  
2  
3 and conducted in collaboration with an advisory board populated by potential knowledge users.  
4  
5 Collectively, they formed an advisory board-researcher collaboration who are acknowledged or  
6  
7 listed as coauthors on this paper.  
8  
9

10 A collaborative framework was used by the advisory board-researcher collaboration to  
11  
12 structure the development of CONSORT-Equity 2017 and to foster an integrated KT approach  
13  
14 (21). Participatory methods were used to facilitate engagement within the advisory board-  
15  
16 researcher collaboration and to build consensus in mutually-agreed upon processes to co-create  
17  
18 knowledge and assemble empirical evidence. The advisory board-researcher collaboration was  
19  
20 established to function as a partnership throughout the study process to promote inclusion and  
21  
22 respect for a multiplicity of perspectives. The collaborative framework structured ongoing  
23  
24 negotiations and replicable steps that occurred within the advisory board-researcher collaboration  
25  
26 to ensure that the goals of the study were achieved: to conduct research in a collaborative manner  
27  
28 that uses consensus-building methods and involves co-creation of knowledge; and, to develop a  
29  
30 reporting guideline for equity (CONSORT-Equity 2017) as a contribution to address health  
31  
32 systems equity issues. An online survey was used to assess the advisory board-researcher  
33  
34 member perceptions on the integrated KT approach and impact on co-creation of knowledge.  
35  
36  
37  
38  
39

#### 40 **Patient and public involvement**

41  
42 Patients and members of patient organizations have been involved in the design, conduct  
43  
44 and reporting of the work reported in this manuscript, and are identified as co-authors on the  
45  
46 work presented here. Our manuscript reports on the extension of CONSORT for equity and  
47  
48 research study processes conducted with knowledge users who include patients and members of  
49  
50 patient organization. For this reason, the work that is presented here is an example of how to  
51  
52 conduct reporting guideline development in ways that include patient priorities, experiences and  
53  
54  
55  
56  
57  
58  
59  
60

1  
2  
3 preferences. Patients and members of patient organizations have provided content-related  
4 support, and knowledge, skills and experience to the study throughout the multiple stages of the  
5 research study process (i.e., the Integrated Knowledge Translation (KT) process) and that  
6 includes the planning and conduct of dissemination (road-testing of CONSORT-Equity 2017  
7 with groups that include patient and patient organizations) We thank the participating members  
8 of patient and patient organization for their advice and support throughout the work to develop  
9 CONSORT-Equity 2017.  
10  
11  
12  
13  
14  
15  
16  
17  
18

## 19 RESULTS

### 20 Description of the integrated KT approach

21 We describe two essential stages and associated sub-steps in the conduct of the mixed-  
22 method study to develop CONSORT-Equity 2017 (Figure 1):  
23  
24  
25  
26  
27

- 28 1) Establish guiding features,
- 29 2) Engage in research actions that support the co-creation of knowledge throughout the  
30 study processes in the development of a reporting guideline for equity.  
31  
32  
33  
34  
35  
36  
37

38 Stage 1: Establish Guiding Features (Table 1):

39  
40 **Find Common Ground.** For CONSORT-Equity 2017, finding common ground was an iterative  
41 three step process: 1) Define knowledge users and their common interests and concerns: Two  
42 researcher members (VW, PT) recognized the interest and need to extend CONSORT for equity  
43 and engaged others who shared concerns about equity in health systems; 2) researcher members  
44 then identified other individuals who held relevant knowledge, and built relationships among  
45 other potential interdisciplinary team members; 3) the growing group of interdisciplinary team  
46 members then defined parameters of the study relationships to find common ground. The  
47  
48  
49  
50  
51  
52  
53  
54  
55  
56  
57  
58  
59  
60

1  
2  
3 objectives of a potential research study and study parameters were developed and articulated in a  
4 research proposal that was submitted for funding. Following the success of the funding proposal,  
5 the 3-step process was engaged in again, expanding CONSORT-Equity 2017 networks,  
6 relationships, the study objectives and parameters, and that led to the formation of a CONSORT-  
7 Equity advisory board.  
8  
9  
10  
11  
12  
13

14 **Form an Advisory Board.** At the start of the study, the importance of collaboration with  
15 knowledge user groups during the development of CONSORT-Equity 2017 was identified. An  
16 international CONSORT-Equity advisory board of intended users across a range of perspectives  
17 were defined and recruited: journal editors, trialists, bioethicists, patients and members of the  
18 public, clinicians, systematic review authors, policy makers, and funders. One facilitator was  
19 identified to coordinate the advisory board (JJ) and another to facilitate the researcher group  
20 (VW) to ensure communication within and between the groups (Table 2). The inclusion of the  
21 advisory board created an opportunity to expand on and explore concepts related to health  
22 equity.  
23  
24  
25  
26  
27  
28  
29  
30  
31  
32  
33  
34

35 **Commit to Ethical Guidance.** The members of the advisory board-researcher collaboration  
36 made decisions to structure the study in adherence to ethical guidelines. These agreements  
37 structured communication and consensus-building processes (20) with the aim to ensure respect  
38 for and representation of a broad range of views.  
39  
40  
41  
42  
43  
44  
45  
46

47 **Clarify Theoretical Perspective.** Absent and/or poor-quality evidence about health equity is  
48 identified by policy makers as a key limitation of research (22). The lack of consensus on the use  
49 of the terms related to health equity, health inequality, and health disparities was identified as an  
50 important feature in the development of a reporting guideline to address health inequity.  
51  
52  
53  
54  
55  
56  
57  
58  
59  
60

1  
2  
3 Therefore, the members of the advisory board-researcher collaboration sought to clarify  
4 terminology and the underpinning assumptions, and to relate these understandings in accessible  
5 work plans (19, 20). Theory-based assumptions were revisited and reflected upon during the  
6  
7  
8  
9  
10 conduct of the study to develop CONSORT-Equity 2017.  
11  
12  
13

#### 14 Stage 2: Engage in Research Actions

15  
16 **Conduct Study.** The multi-phase CONSORT-Equity 2017 study was bound by the agreed-upon  
17 guiding features of the research approach and conducted to accomplish its objectives and  
18 products over a two-year timeframe. The use of participatory methods promoted consensus  
19 building, and resulted in the co-creation of knowledge during the study. The five steps of the  
20 study included (i) define (establish guideline need among knowledge user collaborators), (ii)  
21 assess (state of the literature, experts on health equity), (iii) develop/adapt (propose and debate  
22 adaptation of guideline), (iv) disseminate (develop and execute plan for uptake of guideline), and  
23  
24  
25  
26  
27  
28  
29  
30  
31  
32  
33 (v) apply (process of road-testing guideline).  
34  
35  
36  
37  
38  
39  
40  
41  
42  
43  
44  
45  
46  
47  
48  
49  
50  
51  
52  
53  
54  
55  
56  
57  
58  
59  
60

Table 1. Essential phases and associate sub-steps in the development of CONSORT-Equity 2017

| <b>Stage 1: Establish Guiding Features</b> | <b>Example</b>                                                                                                                                                                                                                                                                                                                                                                                                                                                                                              |
|--------------------------------------------|-------------------------------------------------------------------------------------------------------------------------------------------------------------------------------------------------------------------------------------------------------------------------------------------------------------------------------------------------------------------------------------------------------------------------------------------------------------------------------------------------------------|
| 1) Find Common Ground                      | A process to initiate and develop a collaborative work plan that for CONSORT-Equity 2017 was an iterative 3-step process and resulted in a published protocol (19).                                                                                                                                                                                                                                                                                                                                         |
| 2) Form an advisory board                  | Defined advisory board roles, accessed networks to recruit advisory board members; terms of reference to structure relationships within and between the advisory board-researcher collaboration (Table 2). Consensus building processes promoted engagement in active debate and co-creation of knowledge, for example, to define and validate when a randomized trial is health- equity relevant (20).                                                                                                     |
| 3) Commit to ethical guidance              | Advisory board-researcher collaboration agreed on study conduct to adhere to ethical guidelines (in Canada, the Tri-Council Policy Statement Version 2 (23) and that could include other research ethics protocols or requirements considered relevant by knowledge user partners, such as the example of research conduct with Indigenous peoples (24, 25)                                                                                                                                                 |
| 4) Clarify theoretical perspective         | CONSORT-Equity 2017 is premised on understandings of key concepts, their definitions and usage among the advisory board-researcher collaboration: understandings of health equity and agreements among members about underpinning assumptions: the role of social determinants of health theory, a definition of “health equity”, a health-equity relevant randomized trial, when is there a health disadvantage (19, 20).                                                                                  |
| <b>Stage 2: Engage in Research Actions</b> | <b>Example</b>                                                                                                                                                                                                                                                                                                                                                                                                                                                                                              |
| 5) Conduct study                           | The five research study steps in stage 2 are bound by the guiding features of stage 1: i) define, ii) assess, iii) develop/adapt, iv) disseminate, v) apply. Study outcomes are reflected in the success of an invitational study meeting (the 2016 Boston Equity Symposium) and co-authored publications (20, 26-28) and the CONSORT-Equity 2017 checklist elaboration and explanation (27, 29). Work is underway to further disseminate and promote the application of the CONSORT-Equity 2017 guideline. |

Table 2. Terms of Reference

|                                       |                                                                                                                                                                                                                                                                                                                                                                                                    |
|---------------------------------------|----------------------------------------------------------------------------------------------------------------------------------------------------------------------------------------------------------------------------------------------------------------------------------------------------------------------------------------------------------------------------------------------------|
| Role of advisory board membership     | <ul style="list-style-type: none"> <li>-Members to participate in a collaborative process</li> <li>-Members will provide content-related support, and bring knowledge, skills and experience to the working group throughout the multiple stages of the research study process (i.e., the Integrated Knowledge Translation (KT) process including the end-of-grant dissemination)</li> </ul>       |
| Method and frequency of communication | <ul style="list-style-type: none"> <li>-The facilitator (JJ) will provide study background documents</li> <li>-Agendas to be provided in advance of meetings, with identification of key decisions to be made by the advisory board</li> <li>-There will be ongoing opportunities for communication, in a manner that facilitates the function of advisory board members in their roles</li> </ul> |
| Description of workload               | <ul style="list-style-type: none"> <li>-Meeting participation by members</li> <li>-Provision of feedback on key issues will be made in meetings or by email correspondence</li> <li>-There will be opportunities for interested advisory board members to meet authorship criteria (see below “Authorship”)</li> </ul>                                                                             |
| Timelines                             | <ul style="list-style-type: none"> <li>-The advisory board involvement is anticipated to begin in June 2015, and end in December 2016</li> <li>-Meetings and/or updates will occur every 2 to 3 months (3 to 5 meetings/year, and with brief email correspondence)</li> </ul>                                                                                                                      |
| How advice will be managed            | <ul style="list-style-type: none"> <li>-Advisory board input will be sought and considered along with that of the core research team.</li> <li>-Disagreements on views will be respectfully and collaboratively managed by the advisory board facilitator (JJ)</li> </ul>                                                                                                                          |
| Authorship                            | <ul style="list-style-type: none"> <li>-Criteria outlined by International Journal Committee of Medical Journal Editors (IJCME) will be used to guide publication authorship (30).</li> </ul>                                                                                                                                                                                                      |

### Perceptions on the integrated KT approach and impact on co-creation of knowledge

There is little evidence about the experiences of interdisciplinary teams that include patient and members of the public in the development of reporting guidelines. Previous work to investigate perspectives in clinical guideline development concluded that effective engagement requires planning, and the recommendations arising from that work include: the use of smaller

1  
2  
3 and more diverse groups, with no prior relationships with other members of the team; individual  
4  
5 and group preparation for engagement on the team; and, an identified contact person for  
6  
7 participants (31). Our work involved interdisciplinary members of the advisory board-researcher  
8  
9 collaboration and included patient and members of the public, with 38 members from eight  
10  
11 countries. Furthermore, our use of an integrated KT approach meant that there were many  
12  
13 opportunities to be fully involved in the entire research process. The members of the advisory  
14  
15 board-researcher collaboration were invited to participate in all phases of the reporting guideline  
16  
17 development process, and efforts were made to accommodate their participation.  
18  
19  
20

21 We prioritized the engagement of advisory board-researcher members in the study to  
22  
23 improve applicability of CONSORT-Equity 2017. To strive for authentic (that is, ethical,  
24  
25 equitable) engagement, deliberate efforts were made to foster partnerships with a broad range of  
26  
27 international knowledge users. We purposefully sought a range of views and ideas about the  
28  
29 different characteristics and social circumstances of individuals and populations. We failed to  
30  
31 engage with one group member due to time constraints around their ability to participate; and it  
32  
33 was not possible for every member of the advisory board-researcher collaboration to have their  
34  
35 views accommodated so that some members chose to remove themselves from participation  
36  
37 either temporarily or permanently (n=2). As well, it was not possible (and indicated as not  
38  
39 desirable by respondents) for every member of the collaboration to participate in every step of  
40  
41 the guideline development process, although information was always available and shared with  
42  
43 the group. As collaboration and consensus-building methods were a central feature in  
44  
45 CONSORT-Equity 2017 development, it was also important to understand the study experiences  
46  
47 of those who were involved in the reporting guideline development.  
48  
49  
50  
51  
52  
53  
54  
55  
56  
57  
58  
59  
60



1  
2  
3 The members of advisory board-researcher collaboration were asked to participate in a  
4 short survey following the development of the CONSORT-Equity 2017 reporting guideline. In  
5 consultation with an integrated KT expert (IDG), an on-line survey was developed, pilot-tested  
6 and ethics approval obtained. The brief survey was subsequently administered in July 2017 to the  
7 advisory board-researcher members, and their feedback on their experiences with the use of  
8 integrated KT approach was sought. There were 38 individuals invited to participate in the  
9 survey, with one declining to participate due to time constraints. Of the 37 surveyed members of  
10 the advisory board-researcher collaboration, there were 25 respondents (response rate of 67.5%).

11  
12 The survey was used to gather feedback on the experience with the integrated KT  
13 approach, and the response to eight survey questions are presented here. Two questions report on  
14 the overarching experience of engagement and satisfaction with the use of an integrated KT  
15 approach during the development of CONSORT-Equity 2017. When asked “Overall, how would  
16 you rate the extent to which the research team engaged you in the study? (Where 1 is not at  
17 all and 5 is completely engaged)”, 16/25 (64%) of surveyed respondents indicated being  
18 completely engaged: “I had a concrete role in the process and the team was very respectful and  
19 considerate of input so it was easy to feel invested”. In response to the question “How satisfied  
20 are you with the level of your engagement with the research team? (Where 1 is not at all satisfied  
21 and 5 is totally satisfied)”, 19/25 (76%) of surveyed respondents indicated being totally satisfied:  
22 “ [I would] be happy (very) if all research teams engaged all participants in the same manner”.

23  
24 In the survey, respondents were asked six questions to learn details about their experience  
25 with the integrated KT approach, and frequency counts of the type of responses were recorded  
26 and are reported in Table 3. When participants were asked what they perceived as the benefits of  
27 an integrated KT approach (question 1), the most common (56%) response described integrated

KT as an approach that allows multiple voices/opinions to be heard and considered. In response to being asked about whether they thought that the team faced any challenges in the study as the result of the integrated KT approach (question 2), many participants (32%) reported that the logistics involved with including lots of people was a challenge, and most (36%) reported that they were unaware of any team challenges. When asked about whether they faced any challenges in the study as the result of the integrated KT approach (question 3), most participants (76%) indicated that they did not face any challenges in the study. Participants were asked what they consider to be the impact(s) of using an integrated KT approach with the study (question 4), and the majority (44%) indicated that an integrated KT approach improved the relevance of the final guideline product. When asked if they would change anything about how the integrated KT approach was used (question 5), most participants (56%) indicated that they would not have changed anything. Finally, when asked for additional comments (question 6), while most (76%) had no comment, some (24%) reported that the integrated KT process was a positive experience.

Table 3. Results of team survey about experience with integrated knowledge translation (KT) approach (n=25)].

| Question                                                                                                                                                       | Response                                                                                                                                                                                                                                                                                                                                                                                                                                                                          |
|----------------------------------------------------------------------------------------------------------------------------------------------------------------|-----------------------------------------------------------------------------------------------------------------------------------------------------------------------------------------------------------------------------------------------------------------------------------------------------------------------------------------------------------------------------------------------------------------------------------------------------------------------------------|
| 1. What do you perceive as the benefits of an integrated knowledge translation (KT) approach to develop a reporting guideline extension of CONSORT for equity? | 1) Allows consideration of a range of views: “Capturing a multitude of perspectives, to enhance relevance and acceptability of reporting guidelines across disciplines” (14/25; 56%).<br>2) Fosters engagement in study processes: “It allows participation and engagement of various stakeholders at all stages of the project for whom the guideline is relevant” (6/25; 24%).<br>3) Enhance guideline uptake: “Results are more likely to be adopted and applied” (5/25; 20%). |
| 2. Do you think that <u>the team</u> faced any challenges in the study as the result of the integrated KT approach?                                            | 1) The logistics of including a range of people in the team: “Takes more time to work with a large and diverse crowd” (8/25; 32%);<br>2) Management of perspectives: “Because of the wide range of                                                                                                                                                                                                                                                                                |

|                                                                                                             |                                                                                                                                                                                                                                                                                                                                                                                                                                                                                        |
|-------------------------------------------------------------------------------------------------------------|----------------------------------------------------------------------------------------------------------------------------------------------------------------------------------------------------------------------------------------------------------------------------------------------------------------------------------------------------------------------------------------------------------------------------------------------------------------------------------------|
|                                                                                                             | <p>different disciplines present, it may have been difficult to engage all participants equally across all issues” (5/25; 20%);</p> <p>3) Reconciliation of within-team differences: “It is difficult to deal with perhaps conflicting and at times unclear opinions” (3/25; 12%).</p> <p>4) Unaware of any team challenges: “Not that I'm aware of” (9/25; 36%).</p>                                                                                                                  |
| 3. Did you face any challenges in the study as the result of the integrated KT approach?                    | <p>1) No personal challenges faced in the study: “I did not face any challenges. My input and participation had equal standing in the process” (19/25; 76%).</p> <p>2) The personal experience of challenge related to the pace, number of consultations, and/or to provide informed opinions: “It was slow at times and a bit frustrating. We achieved what we did through patience, persistence and good will of team members” (6/25; 24%).</p>                                      |
| 4. What do you consider to be the impact(s) of using an integrated KT approach with the study?              | <p>1) Improves the final guideline product: “I feel that we produced a product that was relevant to all of our team members, and that they can support in their communities” (11/25; 44%).</p> <p>2) Inclusion of different forms of knowledge: “It ensures that the study is better informed by the expertise, perspectives and needs of the different stakeholders” (11/25; 44%).</p> <p>3) Unsure/did not notice impact of integrated KT approach: “Not sure” (3/25; 12%).</p>      |
| 5. Would you have changed anything about how the integrated KT approach was used in the study? If yes, how? | <p>1) Would not change the use of the integrated KT approach “No change suggested” (8/15; 53.33%).</p> <p>2) Greater range of participants: “I would have tried to broaden the scope of stakeholders” (3/15; 20%).</p> <p>3) Narrow the stakeholder focus and seek more intense consultations, such as through in-person meetings: “Smaller reach, deeper consultation” (2/15; 13.33%).</p> <p>4) More time: “More time is always a benefit to measure the impact” (2/15; 13.33%).</p> |
| 6. Do you have any additional comments?                                                                     | <p>1) No comment (19/25; 76%).</p> <p>2) Indicated that it was a positive experience: “I would do this again” (6/25; 24%).</p>                                                                                                                                                                                                                                                                                                                                                         |

### Challenges and strengths with an integrated KT approach with guideline development

The challenges of integrated KT approach include work and time constraints for those in the advisory board-researcher collaboration, reliance upon facilitators at one site for fostering regular and productive contacts among international members, and the use of online

1  
2  
3 communications (versus face-to-face) with many members of the advisory board-researcher  
4 collaboration and the subsequent impacts on participation. At times, communication between and  
5 within those in the collaboration was a challenge due to the logistics of distance and time zones,  
6 the numbers of people, and the range of views to bring together and accommodate to achieve  
7 study objectives. The strengths of the integrated KT approach include that in the study it was  
8 possible to build and/or strengthen research relationships across a range of knowledge users that  
9 include patients and members of the public (within or related to research communities). These  
10 research relationships were demonstrated by participation in publication co-authorship,  
11 attendance at regular meetings, email contacts, and feedback on products.  
12  
13  
14  
15  
16  
17  
18  
19  
20  
21  
22  
23

24         The success of the longer-term engagement of the members in the advisory board-  
25 researcher collaboration was possibly due to the options for regular and ongoing opportunities to  
26 re-engage at different stages of the study. The facilitators sought to create inclusive, frequent and  
27 varied opportunities for participation in the study processes through scheduled face-to-face  
28 and/or telephone calls, and maintained regular email study updates. We also sought more distant  
29 engagement with broader networks associated with the advisory board-researcher collaboration.  
30 For example, we presented different stages of the work at face-to-face meetings and at  
31 conferences; advisory board-researcher collaboration members held discussions within their  
32 networks about different aspects of the study. Opportunities for discussion and inclusion of ideas  
33 in publications were ongoing and clearly indicated terms of reference structured opportunities for  
34 authorship or other forms of acknowledgement and that aimed to be inclusive of many ideas to  
35 co-create knowledge. Overall, a committed group of advisory board-researcher collaboration  
36 members were involved and integrated in a collaborative effort for the duration of the study and  
37  
38  
39  
40  
41  
42  
43  
44  
45  
46  
47  
48  
49  
50  
51  
52  
53  
54  
55  
56  
57  
58  
59  
60

1  
2  
3 that resulted in agreed upon objectives and products and that were considered in relation to the  
4  
5 context of the knowledge user.  
6

## 7 8 **CONCLUSIONS**

9  
10 A previously developed collaborative framework structured and facilitated ongoing  
11 negotiations to develop the CONSORT-Equity 2017 reporting guideline. Members of an  
12 advisory board-researcher collaboration agreed upon and then made steady and successive  
13 achievements in study goals to collaboratively develop the reporting guideline. The use of  
14 integrated KT fostered equity in the research study processes using participatory methods to  
15 prompt deliberation and consensus building among interdisciplinary team members. Further  
16 work is needed to examine the collaborative framework components and its potential  
17 applications to other initiatives that engage researchers with knowledge users interested in and  
18 seeking to improve research guidance.  
19  
20  
21  
22  
23  
24  
25  
26  
27  
28  
29  
30  
31

32 [Figure 1. Integrated Knowledge Translation (KT) approach for CONSORT-Equity 2017]  
33  
34  
35  
36  
37  
38  
39  
40  
41  
42  
43  
44  
45  
46  
47  
48  
49  
50  
51  
52  
53  
54  
55  
56  
57  
58  
59  
60

1  
2  
3 **Ethics Approval:** Participants gave informed consent before taking part in the study reported in  
4 this manuscript (Bruyère REB Protocol # M16-15-042).  
5  
6  
7

8  
9  
10 **Transparency Statement:** The lead author and guarantor (JJ) affirms that the manuscript is an  
11 honest, accurate, and transparent account of the study being reported; that no important aspects  
12 of the study have been omitted; and that any discrepancies from the study as originally planned  
13 have been explained.  
14  
15  
16  
17

18  
19  
20  
21 **Role of funding source:** Funding was not received for this study.  
22  
23  
24  
25

26 **Data sharing statement:** No additional data available.  
27  
28  
29

30  
31 **Competing interests:** All authors have completed the Unified Competing Interest form  
32 (available on request from the corresponding author) and declare: no support from any  
33 organization for the submitted work; no financial relationships with any organizations that might  
34 have an interest in the previous three years; no other relationships or activities that could appear  
35 to have influenced the submitted work, with the following exceptions: 1) Dr. Cuervo reports he  
36 works as a Senior Advisor for Health Systems Research to the Pan American Health  
37 Organization/World Health Organization. His Organization's Policy on Research for Health calls  
38 for the development and use of research reporting standards and improving the value and impact  
39 of research for health. His opinions and contributions to this manuscript are his own and do not  
40 necessarily reflect the decisions or policies of his employer; 2) Dr. Moher reports that he is one  
41  
42  
43  
44  
45  
46  
47  
48  
49  
50  
51  
52  
53  
54  
55  
56  
57  
58  
59  
60

1  
2  
3 of the ‘inventors’ of CONSORT; 3) Dr. Welch reports grants from Canadian Institutes of Health  
4  
5 Research, grants from Ontario Early Career Researcher Award, during the conduct of the study.  
6  
7  
8  
9

10 **Contributorship Statement:** JJ, IDG, VW conceived and led the design of the work described  
11  
12 in the manuscript and were responsible for the first and final drafts of this manuscript. All  
13  
14 authors participated in and provided substantial contributions to the analysis and interpretation  
15  
16 during development of the work described in the manuscript. JJ led the writing and IDG, EK,  
17  
18 DM, JP, MY, PT, VW made contributions to drafts of this manuscript; all authors including the  
19  
20 listed members of the CONSORT-Equity 2017 and Boston Equity Symposium have reviewed  
21  
22 and revised the manuscript for important intellectual content and approved the final version.  
23  
24  
25  
26  
27  
28

29 Dr. Janet Jull is the guarantor of the article.  
30  
31  
32  
33

### 34 **References**

- 35 1. 63rd World Health Assembly. WHO Strategy on Research for Health; WHO Roles and  
36 responsibilities on health research: document WHA63.22 and Resolution. 20 Avenue Appia,  
37 1211 Geneva 27, Switzerland; 2012.
- 38 2. Pan American Health Organization, 49<sup>th</sup> Directing Council, 61st Session of the Regional  
39 Committee of WHO for the Americas. Policy on research for health: document CD49/10.  
40 Washington, DC: PAHO; 2009.
- 41 3. Glasziou P, Altman DG, Bossuyt P, Boutron I, Clarke M, Julious S, et al. Reducing waste  
42 from incomplete or unusable reports of biomedical research. *Lancet*. 2014;383(9913):267-76.
- 43 4. Bowen S, Graham I. Integrated Knowledge Translation. In: SE Straus, J Tetroe, ID  
44 Graham, editors. *Knowledge Translation in Healthcare: moving evidence to practice*. West  
45 Sussex: Wiley; 2013. p. 14-23.
- 46 5. Van de Ven D, Johnson P. Knowledge for theory and practice. *Academy of Management*  
47 *Review*. 2006;31(4):802-21.
- 48 6. Whitehead M. The concepts and principles of equity and health. *Int J Health Serv*.  
49 1992;22(3):429-45.
- 50 7. Sackett D, Rosenberg W, Gray J, Haynes R, Richardson W. Evidence based medicine:  
51 what it is and what it isn't. *BMJ*. 1996;312:71-2.
- 52 8. Marmot M, Allen J, Bell R, Goldblatt P. Building of the global movement for health  
53 equity: from Santiago to Rio and beyond. *Lancet*. 2012;379(9811):181-8.  
54  
55  
56  
57  
58  
59  
60

- 1  
2  
3 9. Lorenc T, Petticrew M, Welch V, Tugwell P. What types of interventions generate  
4 inequalities? Evidence from systematic reviews. *J Epidemiol Community Health*.  
5 2013;67(2):190-3.
- 6  
7 10. Jarrett L, Patient Involvement Unit (PIU). A report on a study to evaluate patient/  
8 carer membership of the first NICE Guideline Development Groups. London: National Institute for  
9 Clinical Excellence (NICE); 2004.
- 10  
11 11. Qaseem A, Forland F, Macbeth F, Ollenschläger G, Phillips S, van der Wees P, et al.  
12 Guidelines International Network: toward international standards for clinical practice guidelines.  
13 *Ann Intern Med*. 2012;156(7):525-31.
- 14  
15 12. Armstrong MJ, Bloom JA. Patient involvement in guidelines is poor five years after  
16 institute of medicine standards: review of guideline methodologies. *Res Involv Engagem*.  
17 2017;3:19.
- 18  
19 13. Moher D, Schulz KF, Simera I, Altman DG. Guidance for developers of health research  
20 reporting guidelines. *PLoS Med*. 2010;7(2):e1000217.
- 21  
22 14. Graham ID, Logan J, Harrison MB, Straus SE, Tetroe J, Caswell W, et al. Lost in  
23 knowledge translation: time for a map? *J Contin Educ Health Prof*. 2006;26(1):13-24.
- 24  
25 15. Jull J, Giles A, Graham ID. Community-based participatory research and integrated  
26 knowledge translation: advancing the co-creation of knowledge. *Implement Sci*. 2017;12(1):150.
- 27  
28 16. Canadian Institutes of Health Research (CIHR). Guide to knowledge translation planning  
29 at CIHR: integrated and end-of-grant approaches 2015 [Available from: [http://www.cihr-  
30 irsc.gc.ca/e/45321.html](http://www.cihr-irsc.gc.ca/e/45321.html)].
- 31  
32 17. Graham ID, Tetroe J, KT Theories Group. Some theoretical underpinnings of knowledge  
33 translation. *Acad Emerg Med*. 2007;14(11):936-41.
- 34  
35 18. Turner L, Shamseer L, Altman DG, Schulz KF, Moher D. Does use of the CONSORT  
36 Statement impact the completeness of reporting of randomised controlled trials published in  
37 medical journals? A Cochrane review. *Syst Rev*. 2012;1:60.
- 38  
39 19. Welch V, Jull J, Petkovic J, Armstrong R, Boyer Y, Cuervo LG, et al. Protocol for the  
40 development of a CONSORT-equity guideline to improve reporting of health equity in  
41 randomized trials. *Implement Sci*. 2015;10:146.
- 42  
43 20. Jull J, Whitehead M, Petticrew M, Kristjansson E, Gough D, Petkovic J, et al. When is a  
44 randomised controlled trial health equity relevant? Development and validation of a conceptual  
45 framework. *BMJ Open*. 2017;7(9):e015815.
- 46  
47 21. Jull J, Giles A, Boyer Y, Stacey D, Minwaashin Lodge. Building and enacting ethical  
48 research processes: the example of culturally adapting a decision making strategy. *ACME: An  
49 International Journal for Critical Geographies*. 2016;17(3):671-86.
- 50  
51 22. Petticrew M, Whitehead M, Macintyre SJ, Graham H, Egan M. Evidence for public  
52 health policy on inequalities: 1: the reality according to policymakers. *J Epidemiol Community  
53 Health*. 2004;58(10):811-6.
- 54  
55 23. Panel on Research Ethics. TCPS 2 – Chapter 9. Research Involving the First Nations,  
56 Inuit and Métis Peoples of Canada [Available from: [http://www.pre.ethics.gc.ca/eng/policy-  
57 politique/initiatives/tcps2-eptc2/chapter9-chapitre9/](http://www.pre.ethics.gc.ca/eng/policy-politique/initiatives/tcps2-eptc2/chapter9-chapitre9/)].
- 58  
59 24. First Nations Information Governance Centre (FNIGC). The First Nations principles of  
60 OCAP® 2017 [Available from: <http://fnigc.ca/ocap.html>].
25. Canadian Institutes of Health Research (CIHR). CIHR guidelines for health research  
involving Aboriginal People. 2007 [Available from: <http://www.cihr-irsc.gc.ca/e/29134.html>].



- 1  
2  
3 26. Mbuagbaw L, Aves T, Shea B, Jull J, Welch V, Taljaard M, et al. Considerations and  
4 guidance in designing equity-relevant clinical trials. *Int J Equity Health*. 2017;16(1):93.  
5 27. Welch VA, Norheim OF, Jull J, Cookson R, Sommerfelt H, Tugwell P, et al. CONSORT-  
6 Equity 2017 extension and elaboration for better reporting of health equity in randomised trials.  
7 *BMJ*. 2017;359:j5085.  
8 28. Petkovic J, Welch V, Jull J, Petticrew M, Kristjansson E, Rader T, et al. How is health  
9 equity reported and analyzed in randomised trials: Cochrane Systematic Review Registered  
10 Protocol. *Cochrane Methodology Review Group*. 2017(Issue 8 . Art. No.: MR000046).  
11 29. Simera I, Moher D, Hirst A, Hoey J, Schulz KF, Altman DG. Transparent and accurate  
12 reporting increases reliability, utility, and impact of your research: reporting guidelines and the  
13 EQUATOR Network. *BMC Med*. 2010;8:24.  
14 30. International Committee on Medical Journal Editors (ICJME). Defining the role of  
15 authors and contributors 2018 [Available from:  
16 [http://www.icmje.org/recommendations/browse/roles-and-responsibilities/defining-the-role-of-](http://www.icmje.org/recommendations/browse/roles-and-responsibilities/defining-the-role-of-authors-and-contributors.html)  
17 [authors-and-contributors.html](http://www.icmje.org/recommendations/browse/roles-and-responsibilities/defining-the-role-of-authors-and-contributors.html).  
18  
19 31. Armstrong MJ, Mullins CD, Gronseth GS, Gagliardi AR. Recommendations for patient  
20 engagement in guideline development panels: A qualitative focus group study of guideline-naïve  
21 patients. *PLoS One*. 2017;12(3):e0174329.  
22  
23  
24  
25  
26  
27  
28  
29  
30  
31  
32  
33  
34  
35  
36  
37  
38  
39  
40  
41  
42  
43  
44  
45  
46  
47  
48  
49  
50  
51  
52  
53  
54  
55  
56  
57  
58  
59  
60

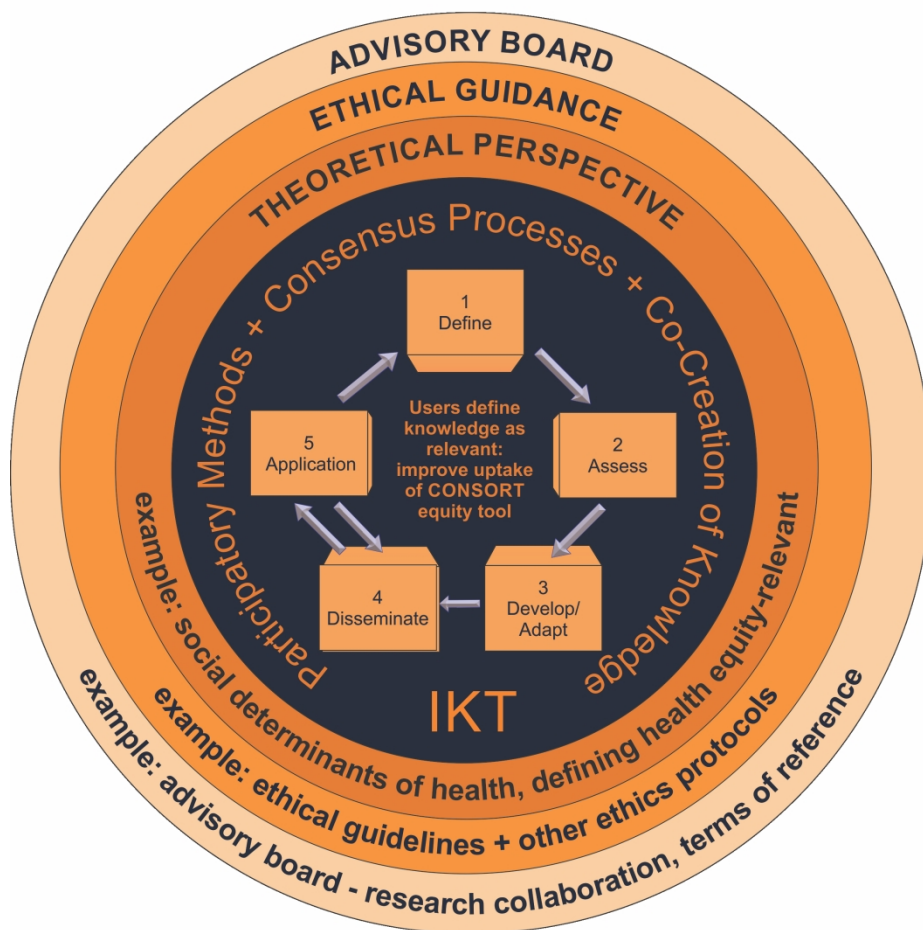

# BMJ Open

## Taking an integrated knowledge translation approach in research to develop a reporting guideline: The example of CONSORT-Equity 2017

|                                 |                                                                                                                                                                                                                                                                                                                                                                                                                                                                                                                                                                                          |
|---------------------------------|------------------------------------------------------------------------------------------------------------------------------------------------------------------------------------------------------------------------------------------------------------------------------------------------------------------------------------------------------------------------------------------------------------------------------------------------------------------------------------------------------------------------------------------------------------------------------------------|
| Journal:                        | <i>BMJ Open</i>                                                                                                                                                                                                                                                                                                                                                                                                                                                                                                                                                                          |
| Manuscript ID                   | bmjopen-2018-026866.R1                                                                                                                                                                                                                                                                                                                                                                                                                                                                                                                                                                   |
| Article Type:                   | Research                                                                                                                                                                                                                                                                                                                                                                                                                                                                                                                                                                                 |
| Date Submitted by the Author:   | 28-Feb-2019                                                                                                                                                                                                                                                                                                                                                                                                                                                                                                                                                                              |
| Complete List of Authors:       | Jull, Janet; Queen's University, School of Rehabilitation Therapy; Ottawa Hospital Research Institute,<br>Graham, Ian; Ottawa Hospital Research Institute,<br>Kristjansson, Elizabeth; University of Ottawa, Institute of Population Health<br>Moher, David; Ottawa Hospital Research Institute, Ottawa Methods Centre<br>Petkovic, Jennifer; University of Ottawa, Bruyere Research Institute<br>Yoganathan, Manosila; Elisabeth Bruyere Research Institute<br>Tugwell, Peter; University of Ottawa, medicine<br>Welch, Vivian A.; University of Ottawa, Institute of Population Health |
| <b>Primary Subject Heading</b>: | Research methods                                                                                                                                                                                                                                                                                                                                                                                                                                                                                                                                                                         |
| Secondary Subject Heading:      | Evidence based practice                                                                                                                                                                                                                                                                                                                                                                                                                                                                                                                                                                  |
| Keywords:                       | health equity, reporting guidelines, CONSORT, integrated knowledge translation, collaborative research, research co-creation                                                                                                                                                                                                                                                                                                                                                                                                                                                             |
|                                 |                                                                                                                                                                                                                                                                                                                                                                                                                                                                                                                                                                                          |

SCHOLARONE™  
Manuscripts

1  
2  
3 **Title:** Taking an integrated knowledge translation approach in research to develop a reporting  
4 guideline: The example of CONSORT-Equity 2017  
5  
6  
7

8 Janet Jull

9 Assistant Professor, School of Rehabilitation Therapy, Queens University, Kingston, Ontario,  
10 Canada; Affiliate Investigator, Ottawa Hospital Research Institute, Ottawa, Ontario, Canada  
11 [janet.jull@queensu.ca](mailto:janet.jull@queensu.ca)  
12

13 Ian D Graham

14 Senior Scientist, Clinical Epidemiology Program, Ottawa Hospital Research Institute; Professor,  
15 School of Epidemiology and Public Health, University of Ottawa, Ottawa, Ontario, Canada  
16 [igraham@ohri.ca](mailto:igraham@ohri.ca)  
17

18 Elizabeth Kristjansson

19 Associate Professor, Centre for Research on Educational and Community Services, School of  
20 Psychology, University of Ottawa, Ottawa, Ontario, Canada  
21 [kristjan@uottawa.ca](mailto:kristjan@uottawa.ca)  
22  
23

24 David Moher

25 Senior Scientist, Clinical Epidemiology Program, Ottawa Hospital Research Institute, Ottawa,  
26 Ontario, Canada; Associate Professor, School of Epidemiology, Public Health and Preventive  
27 Medicine, University of Ottawa, Ottawa, Ontario, Canada.  
28 [dmoher@ohri.ca](mailto:dmoher@ohri.ca)  
29  
30

31 Jennifer Petkovic

32 Coordinator, Campbell and Cochrane Equity Methods Group, Bruyère Research Institute,  
33 Bruyère Continuing Care and University of Ottawa, Ottawa, Ontario, Canada  
34 [jennifer.petkovic@uottawa.ca](mailto:jennifer.petkovic@uottawa.ca)  
35  
36

37 Manosila Yoganathan

38 Coordinator, Bruyère Research Institute, Bruyère Continuing Care and University of Ottawa,  
39 Ottawa, Ontario, Canada  
40 [y.manosilah@gmail.com](mailto:y.manosilah@gmail.com)  
41  
42

43 Peter Tugwell

44 Senior Scientist, Clinical Epidemiology Program, Ottawa Hospital Research Institute, Ottawa,  
45 Ontario, Canada; Professor, Department of Medicine, Faculty of Medicine, University of Ottawa,  
46 Ottawa, Ontario, Canada; Professor, School of Epidemiology and Public Health, Faculty of  
47 Medicine, University of Ottawa, Ottawa, Ontario, Canada  
48 [ptugwell@uottawa.ca](mailto:ptugwell@uottawa.ca)  
49  
50

51 Vivian Welch

52 Scientist, Methods Centre, Bruyère Research Institute, Bruyère Continuing Care and University  
53 of Ottawa, Ottawa, Ontario, Canada,  
54  
55  
56  
57

1  
2  
3 vwelch@campbellcollaboration.org  
4

5 AND

6 Members of the CONSORT-Equity 2017 and Boston Equity Symposium.  
7  
8  
9

10 **Corresponding Author:** Dr. Janet Jull, janet.jull@queensu.ca  
11  
12  
13  
14  
15  
16  
17  
18  
19  
20  
21  
22  
23  
24  
25  
26  
27  
28  
29  
30  
31  
32  
33  
34  
35  
36  
37  
38  
39  
40  
41  
42  
43  
44  
45  
46  
47  
48  
49  
50  
51  
52  
53  
54  
55  
56  
57  
58  
59  
60

For peer review only

**Abstract (299)**

**Objective** We describe the use of an integrated knowledge translation (KT) approach in the development of the CONSolidated Standards Of Reporting Trials extension for equity (“CONSORT-Equity 2017”), and advisory board-researcher members’ (“the team”) perceptions of the integrated KT process.

**Design** An observational study to describe team processes and experience with a structured integrated KT approach to develop CONSORT-Equity 2017. Participant observation to describe team processes and a survey were used with the 38 team members.

**Setting** Use of the CONSORT health-research reporting guideline contributes to an evidence base for health systems’ decision-making, and CONSORT-Equity 2017 may improve reporting about health equity-relevant evidence. An integrated KT research approach engages knowledge users (those whom the research is meant to benefit) with researchers to co-create research evidence and is more likely to produce findings that are applied in practice or policy.

**Participants** Researchers adopted an integrated KT approach and invited knowledge users to form an advisory board-researcher team.

**Results** An integrated KT approach was used in the development of CONSORT-Equity 2017 and structured replicable steps. The process for co-creating the reporting guideline involved two stages: 1) establishing guiding features for co-creation, and 2) research actions that supported the co-creation of the reporting guideline. Stage one consisted of four steps: finding common ground, forming an advisory board, committing to ethical guidance, clarifying theoretical research assumptions. Bound by the stage one guiding features of an integrated KT approach, stage two consisted of five steps during which studies for consensus-based reporting guidelines

1  
2  
3 were conducted. Of 38 team members, 25 (67.5%) completed a survey about their perceptions of  
4  
5 the integrated KT approach.  
6

7  
8 **Conclusions** An integrated KT approach can be used to engage a team to co-create reporting  
9  
10 guidelines. Further study is needed to understand the use of an integrated KT approach in  
11  
12 development of reporting guidelines.  
13

#### 14 15 **Strengths and limitations of this study**

- 16  
17 • Reporting guidelines in health research improve and contribute to a robust evidence base  
18  
19 for health systems decision-making  
20
- 21  
22 • Integrated knowledge translation (KT) is an approach to research that structures the  
23  
24 engagement of knowledge users, meaning those for whom the research is meant to  
25  
26 ultimately be of use, with researchers to facilitate the co-creation of knowledge  
27
- 28  
29 • An integrated KT approach was used to engage knowledge users with researchers to  
30  
31 develop the CONSolidated Standards Of Reporting Trials extension for equity  
32  
33 (“CONSORT-Equity 2017”) reporting guideline  
34
- 35  
36 • Limitations are that the use of an integrated KT approach includes the logistics of  
37  
38 including a range of people and the management of views; the strengths include that the  
39  
40 integrated KT approach allows consideration and inclusion of a range of views.  
41
- 42  
43 • An integrated KT approach can be used to engage knowledge users with researchers to  
44  
45 co-create reporting guidelines.  
46  
47  
48  
49  
50  
51  
52  
53  
54  
55  
56  
57  
58  
59  
60

## INTRODUCTION

Reporting guidelines in health research are important, as they improve and contribute to a more robust evidence base for health systems decision-making (1, 2). There is a significant amount of avoidable waste in research (3), and part of this waste can be attributed to potentially useful research findings being disregarded because of inadequate reporting, which reporting guidelines can help address. Defined as a tool for use by health researchers to structure manuscript writing, reporting guidelines consist of minimal lists of information to ensure that a manuscript can be understood by a reader, replicated by a researcher, used by a clinician to make a clinical decision and included in a systematic review (4). The use of reporting guidelines in health research may improve completeness and transparency of reported evidence from research studies, and many examples of reporting guidelines can be found at the Ottawa Hospital Research Institute's Centre for Journalology site at <http://www.ohri.ca/journalology/docs/guidelines.aspx> (5), as well as the Enhancing the QUALity and Transparency Of health Research (EQUATOR) network site at <https://www.equator-network.org/> (4).

The internationally recognized CONSolidated Standards Of Reporting Trials (CONSORT) statement is an evidence-based guideline consisting of 25 items to encourage completeness and transparency in reporting of randomized controlled trials ("randomized trials"). CONSORT is in the form of a checklist and flow diagram (6). The checklist focuses on reporting how the randomized trial was designed, analyzed and interpreted and the flow diagram depicts participant progress through the randomized trial processes. Extensions to the CONSORT Statement have been developed for specific issues (for example, pragmatic trials, non-pharmacologic therapies,



1  
2  
3 and social and psychological interventions) (4), although none report items to assess the effects  
4  
5 of an intervention on health equity (7).  
6  
7  
8  
9

10 Striving for health equity is a matter of social justice and implies that everyone can attain their  
11 health potential and that no one is disadvantaged by their social positioning or other socially  
12 determined circumstances (8). Randomized trials are a powerful design for determining the  
13 relative impact of an intervention (9). Nevertheless, for randomized trials to contribute  
14 effectively to policies that promote health equity, there remain challenges to overcome (10). For  
15 example, poor reporting of equity considerations for randomized trials can have undesired effects  
16 on health systems' organizational practices and policies, clinical and public care. Additionally,  
17 some interventions can even aggravate and/or undermine health equity (11). Reporting  
18 guidelines are needed to support the consideration of equity in the conduct of and  
19 communication about randomized trials.  
20  
21  
22  
23  
24  
25  
26  
27  
28  
29  
30  
31  
32  
33  
34

35 Engagement is defined here as an arrangement with those who influence, administer and/or who  
36 are active users of healthcare systems in the governance of the research process to co-lead  
37 research and that leads to co-creation of knowledge (beyond being a research participant) (12).  
38  
39

40 While the engagement of knowledge users has been identified as important for clinical guideline  
41 development (13, 14), a recent review of clinical guidelines show that there is evidence for low  
42 levels of such engagement (15). Achieving consensus among developers of health research  
43 guidelines has been identified as important (16), but there is little information on how to achieve  
44 consensus when involving inter-disciplinary knowledge users that include patients and members  
45 of the public in reporting guideline development (17).  
46  
47  
48  
49  
50  
51  
52  
53  
54  
55  
56  
57  
58  
59  
60

### “CONSORT-Equity 2017”

Wishing to produce the highest quality reporting guideline and recognizing that the uptake of the resulting reporting guideline would be critical to improving the reporting of future trials (18), between 2015 and 2017, an interdisciplinary group of knowledge users and researchers came together as an advisory board-researcher team (“the team”) to develop an equity extension of CONSORT, “CONSORT-Equity 2017” (7).

Of particular concern to the group was the need to prompt careful consideration of the knowledge translation issues that might promote uptake of the final reporting guideline product (that is, the equity extension of the CONSORT guideline). “Knowledge translation” (KT) is a term used to refer to processes that bridge the “know-do” gap which is defined as the gap between what is learned from research and the implementation of what is learned by knowledge users, with the aim to improve health delivery systems and health outcomes (19). Initially, know-do gaps (for example, uptake of reporting guidelines) were considered simply a problem of knowledge transfer (20) and with end users only needing to become aware of the knowledge and they would implement it. Understandings of the cause of know-do gaps continue to evolve, and now these gaps are considered to be more of a knowledge production problem (the knowledge being produced does not meet the needs of those who should be using it). Taking this later perspective, addressing the know-do gap requires researchers to begin thinking of KT before knowledge is created (21, 22). Proposed as an approach to address the issues of knowledge production and application (21, 22), “integrated knowledge translation” (integrated KT) is also identified as an approach that is more likely to lead to the practical application of knowledge (20, 23) because knowledge users are involved in co-creating the research which means the findings

1  
2  
3 are more likely to be useful, useable and used (21, 22). As there are issues with the uptake of  
4 reporting guidelines (6) an integrated KT approach is appropriate for the development of  
5 reporting guidelines.  
6  
7  
8  
9

10  
11  
12 Given the presumed benefits of an integrated KT approach and the desire to maximize the  
13 quality, usefulness and use of the reporting guideline, the group decided to adopt an integrated  
14 KT approach to the development of the CONSORT- Equity 2017 reporting guideline so as to  
15 optimize the co-creation of the guideline. In the case of CONSORT-Equity 2017, people from a  
16 broad range of disciplines who are involved in research-related activities and disciplines such as  
17 clinical epidemiology, economics, social science, public health, international development,  
18 knowledge translation, patients or patient organizations (“patients”) and members of the public  
19 are potential users of the reporting guideline (those for whom the research is meant to ultimately  
20 be used by) and so were invited to engage in the research to develop the reporting guideline.  
21  
22  
23  
24  
25  
26  
27  
28  
29  
30  
31  
32  
33  
34

35 The objective of this paper is to describe the use of an integrated KT approach in the  
36 development of the CONSORT-Equity 2017 reporting guideline and team members’ perceptions  
37 of the integrated KT process.  
38  
39  
40  
41  
42  
43

## 44 **METHODS**

45  
46 We adopted an observational study design involving participant observation supplemented with a  
47 survey of team members to produce a description of team processes and experiences with the  
48 structured integrated KT approach used to develop the CONSORT-Equity 2017 reporting  
49 guideline (7). The research stages followed in developing the reporting guideline are described in  
50  
51  
52  
53  
54  
55  
56  
57  
58  
59  
60

1  
2  
3 detail in a published protocol (7). Participant observation is a qualitative and interactive process  
4 that connects to human experience through immersion and participation in a particular context  
5  
6 (24). The processes to develop CONSORT-Equity 2017 were structured by a framework that  
7  
8 depicts integrated KT (25). The framework originally was developed to describe the  
9  
10 collaborative processes of work conducted by researchers in full partnership with an Indigenous  
11  
12 community to culturally adapt a shared decision making tool through research processes of  
13  
14 development, conduct and dissemination (25). The framework consists of two stages that involve  
15  
16 knowledge users and researchers agreeing to establish the parameters of the study (forming an  
17  
18 advisory body, agreements on the approach to ethics, and theoretical assumptions in the  
19  
20 research) and then the conduct of the study with the knowledge users and researchers in full  
21  
22 partnership throughout the steps of a series of studies. The collaborative framework describes  
23  
24 structured processes of negotiation within the study partnerships and that engages knowledge  
25  
26 users as full partners with researchers (25). As engagement of knowledge users throughout the  
27  
28 development of CONSORT-Equity 2017 was a priority, the framework was selected as  
29  
30 appropriate for use. We describe the study processes of CONSORT-Equity 2017 in relation to  
31  
32 the framework that depicts integrated KT.  
33  
34  
35  
36  
37  
38  
39  
40  
41

42 We used the previously developed framework to guide and organize documented observations  
43  
44 and events to describe the development of CONSORT-Equity 2017 (26). At the completion of  
45  
46 the study, team members were surveyed about their perceptions of the integrated KT approach.  
47  
48  
49  
50

51 The survey was developed for team members to gather their feedback on the experience with the  
52  
53 integrated KT approach. In consultation with an integrated KT expert (IDG), an eight-question  
54  
55  
56  
57  
58  
59  
60

1  
2  
3 on-line survey consisting of two Likert and six open-ended questions about experience with  
4 integrated KT during the CONSORT-Equity 2017 study was developed, pilot-tested and research  
5 ethics approval obtained from the Bruyère Research Ethics Board (Bruyère REB Protocol #  
6 M16-15-042). The survey questions were designed to evoke understandings of the team  
7 experiences, with the two Likert questions about the extent to which team members felt they  
8 were engaged, and satisfaction with engagement. The open-ended questions were aimed at  
9 details on the experience with integrated KT during the CONSORT-Equity 2017 study. The team  
10 members were asked to participate in a survey following the development of the CONSORT-  
11 Equity 2017 reporting guideline. There were 38 individuals invited to participate in the survey,  
12 with one declining to participate due to time constraints.  
13  
14  
15  
16  
17  
18  
19  
20  
21  
22  
23  
24  
25  
26  
27

28 Following a process of informed consent, the survey was administered in July 2017 to the team  
29 members. The frequency of the responses to the two Likert questions were tabulated. To analyze  
30 participant responses to the six-open ended survey questions, a process of inductive content  
31 analysis was used and that involves segmenting responses by topics and into categories. For the  
32 analysis of these responses, each question was considered to be a topic and the responses and  
33 development of codes defined the content in each category (27). One researcher conducted the  
34 content analysis process (JJ) and that was confirmed by a second reviewer (MY).  
35  
36  
37  
38  
39  
40  
41  
42  
43  
44  
45  
46

### 47 **Patients and Public Involvement**

48  
49 Knowledge users who include patients and members of the public have been involved in the  
50 design, conduct and reporting of the work reported in this manuscript to develop CONSORT-  
51 Equity 2017, and are also identified as co-authors or acknowledged on the work presented here.  
52  
53  
54  
55  
56  
57  
58  
59  
60

1  
2  
3 Patient priorities, experience, and preferences informed the development of research questions  
4 and outcome measures that are reported in this document to describe the research processes of  
5  
6 CONSORT-Equity 2017. Patients were also involved in the design of the study reported in this  
7  
8 paper and that is the result of consultation with the knowledge user group about reporting on the  
9  
10 experience with an integrated KT approach to develop CONSORT-Equity 2017. Patients were  
11  
12 involved in the recruitment to the study reported here and have participated in the development  
13  
14 of this document. The membership and roles of knowledge users who include patients and  
15  
16 members of the public are reported in the study protocol and final product documents (7, 17, 18,  
17  
18 28). For this reason, the work that is presented here is one example of how to conduct and report  
19  
20 on the development of reporting guidelines in ways that include knowledge user priorities,  
21  
22 experiences and preferences and that include patients and members of the public (29).  
23  
24  
25  
26  
27  
28  
29

## 30 31 **RESULTS**

32  
33 The development of CONSORT-Equity 2017 used an integrated KT approach to structure  
34  
35 replicable steps: to conduct research in a collaborative manner that uses consensus-building  
36  
37 methods and involves co-creation of knowledge (25); and, to develop a reporting guideline for  
38  
39 equity (CONSORT-Equity 2017). The process for co-creating the reporting guideline involved  
40  
41 two stages: 1) establishing guiding features for co-creation, and 2) engaging knowledge users  
42  
43 and researchers (the team) in research actions that supported the co-creation of the reporting  
44  
45 guideline.  
46  
47  
48  
49  
50  
51  
52  
53  
54  
55  
56  
57  
58  
59  
60

### Stage 1: Established Guiding Features for Co-creation

**Preparation: Finding common ground.** Initiating a process to engage researchers with potential knowledge users in the development of CONSORT-Equity 2017 involved: 1) identifying knowledge users' interests and concerns and finding alignment with researchers; 2) building relationships among knowledge users and researchers; 3) defining parameters of team relationships to find common ground through collaboration (25).

Finding common ground was an iterative three-step process of preparation of researchers, knowledge users and resulted in an agreed-upon agenda aimed at identifying their common interests. Two researcher members (VW, PT) recognized the interest and need to extend CONSORT for equity. Next, these researcher members identified other individuals (funders, journal editors, researchers) who held relevant knowledge and who shared concerns about equity in health systems, and so relationships were built among these individuals to form a rudimentary research team. The growing research team defined the objectives of a reporting guideline project and parameters in a proposal that was submitted for funding. Following the success of the funding proposal, the iterative, three-step process was then engaged in again with the recognition of the need to include a broader range of knowledge users.

**An Advisory Board was formed.** Collaboration with knowledge user groups during the development of CONSORT-Equity 2017 was identified as an important feature of the study by the research team, and with a decision to form an advisory board of intended users of the reporting guideline. The importance of collaboration with knowledge user groups during the development of CONSORT-Equity 2017 led to the deliberate defining of roles and recruitment

1  
2  
3 of nine knowledge users to the advisory board: journal editors, trialists, bioethicists, patients and  
4  
5 members of the public, clinicians, systematic review authors, policy makers, and funders. The  
6  
7 advisory board is described in detail elsewhere (7). The need to ensure communication within  
8  
9 and between the members of the advisory board-researcher groups was identified, and two  
10  
11 members of the researcher group were selected as facilitators: one with the advisory board (JJ)  
12  
13 and the other with the researcher group (VW).  
14  
15

16  
17  
18  
19 The facilitator identified to coordinate the advisory board (JJ) worked with the advisory board to  
20  
21 define terms of reference and that included expectations (for example, meetings, types of  
22  
23 contributions) and opportunities (for example, authorship guidelines) (Table 1). The facilitators  
24  
25 (JJ, VW) worked to make plans and schedule events that created opportunities for the advisory  
26  
27 board-researcher groups, referred to as “the team”, to function in a partnership to promote  
28  
29 inclusion and respect for a multiplicity of views in the CONSORT-Equity 2017 study. The  
30  
31 engagement between the members of the team created opportunities to explore concepts related  
32  
33 to health equity, and are reflected in products (for example, a tool to identify when a randomized  
34  
35 trial is health-equity relevant (18)). Finally, the team members defined and agreed upon an  
36  
37 agenda for the study and that is published in a protocol (7).  
38  
39  
40  
41  
42  
43

44  
45 ***Commitment to Ethical Guidance.*** The members of the team agreed to collaborate and engage  
46  
47 in decisions about how to structure the development of the reporting guideline so that there was  
48  
49 adherence to ethical guidelines. The aim was to ensure respect for and representation of a broad  
50  
51 range of views through agreements, structured communication and consensus-building processes  
52  
53  
54  
55  
56  
57  
58  
59  
60



1  
2  
3 (18). The team agreed to adhere to Canadian ethical research guidelines during the conduct of the  
4  
5 CONSORT-Equity study(30).  
6  
7  
8  
9

10 ***Theoretical Perspective Clarified.*** Absent and/or poor-quality evidence about health equity is  
11 identified by policy makers as a key limitation of research (31). The team identified the lack of  
12 consensus on the use of terminology related to health equity concepts and underpinning  
13 assumptions as critical to address in the reporting guideline. Therefore, the members of the team  
14 sought to clarify terminology and relate these understandings in publications to define the study  
15 parameters (7, 18). The team reflected on the underpinning assumptions throughout the reporting  
16 guideline development process (for example, a focus on social determinants of health theory,  
17 revisiting and reflecting on meanings of health equity et cetera).  
18  
19  
20  
21  
22  
23  
24  
25  
26  
27  
28  
29  
30

## 31 **Stage 2: Research actions that supported the co-creation of the reporting guideline**

32  
33 ***Reporting guideline development process.*** The agreed-upon guiding features of the research  
34 approach (Stage 1) were used to structure the multi-phase CONSORT-Equity 2017 study to  
35 accomplish objectives and create products over a two-year timeframe (Table 2). The use of  
36 participatory methods were used to promote consensus building, and to result in the co-creation  
37 of knowledge during the guideline reporting development. Stage two consisted of five steps  
38 during which studies for consensus-based reporting guidelines were conducted. The team co-  
39 created the CONSORT-Equity 2017 following the methodology for reporting guideline  
40 development advanced by Moher et al. (16) and with the innovation of key informant interviews  
41 (17). The five steps in reporting guideline development are: (i) define (establish guideline need  
42 within knowledge user and researcher collaboration), (ii) assess (state of the literature,  
43  
44  
45  
46  
47  
48  
49  
50  
51  
52  
53  
54  
55  
56  
57  
58  
59  
60

consultation with experts on health equity), (iii) develop/adapt (propose and debate adaptation of the reporting guideline), (iv) disseminate (develop and execute plan for uptake of the reporting guideline), and (v) apply (process of road-testing the reporting guideline).

|                                       |                                                                                                                                                                                                                                                                                                                                                                                                    |
|---------------------------------------|----------------------------------------------------------------------------------------------------------------------------------------------------------------------------------------------------------------------------------------------------------------------------------------------------------------------------------------------------------------------------------------------------|
| Role of advisory board membership     | <ul style="list-style-type: none"> <li>-Members to participate in a collaborative process</li> <li>-Members will provide content-related support, and bring knowledge, skills and experience to the working group throughout the multiple stages of the research study process (i.e., the integrated Knowledge Translation (KT) process including the end-of-grant dissemination)</li> </ul>       |
| Method and frequency of communication | <ul style="list-style-type: none"> <li>-The facilitator (JJ) will provide study background documents</li> <li>-Agendas to be provided in advance of meetings, with identification of key decisions to be made by the advisory board</li> <li>-There will be ongoing opportunities for communication, in a manner that facilitates the function of advisory board members in their roles</li> </ul> |
| Description of workload               | <ul style="list-style-type: none"> <li>-Meeting participation by members</li> <li>-Provision of feedback on key issues will be made in meetings or by email correspondence</li> <li>-There will be opportunities for interested advisory board members to meet authorship criteria (see below “Authorship”)</li> </ul>                                                                             |
| Timelines                             | <ul style="list-style-type: none"> <li>-The advisory board involvement is anticipated to begin in June 2015, and end in December 2016</li> <li>-Meetings and/or updates will occur every 2 to 3 months (3 to 5 meetings/year, and with brief email correspondence)</li> </ul>                                                                                                                      |
| How advice will be managed            | <ul style="list-style-type: none"> <li>-Advisory board input will be sought and considered along with that of the core research team.</li> <li>-Disagreements on views will be respectfully and collaboratively managed by the advisory board facilitator (JJ)</li> </ul>                                                                                                                          |
| Authorship                            | <ul style="list-style-type: none"> <li>-Criteria outlined by International Journal Committee of Medical Journal Editors (IJCME) will be used to guide publication authorship (32).</li> </ul>                                                                                                                                                                                                      |

Table 1. Terms of Reference

1  
2  
3  
4  
5  
6  
7  
8  
9  
10  
11  
12  
13  
14  
15  
16  
17  
18  
19  
20  
21  
22  
23  
24  
25  
26  
27  
28  
29  
30  
31  
32  
33  
34  
35  
36  
37  
38  
39  
40  
41  
42  
43  
44  
45  
46  
47  
48  
49  
50  
51  
52  
53  
54  
55  
56  
57  
58  
59  
60

For peer review only

Table 2. Stages in the development of CONSORT-Equity 2017 update terms

| <b>Stage 1: Establish Guiding Features</b>                                                                                                 | <b>Example</b>                                                                                                                                                                                                                                                                                                                                                                                                                                                   |
|--------------------------------------------------------------------------------------------------------------------------------------------|------------------------------------------------------------------------------------------------------------------------------------------------------------------------------------------------------------------------------------------------------------------------------------------------------------------------------------------------------------------------------------------------------------------------------------------------------------------|
| 1) Find Common Ground                                                                                                                      | A process to initiate and develop a collaborative work plan that for CONSORT-Equity 2017 was an iterative 3-step process to prepare researchers, knowledge users and set an agreed-upon agenda that resulted in a published protocol (7).                                                                                                                                                                                                                        |
| 2) Form an advisory board                                                                                                                  | Defined advisory board roles, accessed networks to recruit advisory board members; terms of reference to structure relationships within and between the advisory board-researcher collaboration (Table 1). Consensus building processes promoted engagement in active debate and co-creation of knowledge that resulted in, for example, defining and validating when a randomized trial is health- equity relevant (18).                                        |
| 3) Commit to ethical guidance                                                                                                              | Advisory board-researcher collaboration agreed on study conduct to adhere to ethical guidelines (in Canada, the Tri-Council Policy Statement Version 2 (33) and that could include other research ethics protocols or requirements considered relevant by knowledge user partners, such as the example of research conduct with Indigenous Peoples (34, 35).                                                                                                     |
| 4) Clarify theoretical perspective                                                                                                         | CONSORT-Equity 2017 is premised on understandings of key concepts, their definitions and usage among the advisory board-researcher collaboration: understandings of health equity and agreements among members about underpinning assumptions: the role of social determinants of health theory, a definition of “health equity”, a health-equity relevant randomized trial, when is there a health disadvantage and that are reflected in publications (7, 18). |
| <b>Stage 2: Research actions that supported the co-creation of the reporting guideline.</b><br><br>Reporting guideline development process | <b>Example:</b> The five reporting guideline development steps in stage 2 are bound by the guiding features of stage 1.                                                                                                                                                                                                                                                                                                                                          |
| 1) Define                                                                                                                                  | Establish guideline need within knowledge user and researcher collaboration: knowledge users were engaged with researchers in a process to determine whether and how they might collaborate to develop an extension of CONSORT for equity. Following funding further work among the team resulted in a published protocol (7) and a tool that determines when a randomized trial is health-equity                                                                |

|                  |                                                                                                                                                                                                                                                                                                                                                                                                                                                                                         |
|------------------|-----------------------------------------------------------------------------------------------------------------------------------------------------------------------------------------------------------------------------------------------------------------------------------------------------------------------------------------------------------------------------------------------------------------------------------------------------------------------------------------|
|                  | relevant (18) and so should use a reporting guideline for health equity.                                                                                                                                                                                                                                                                                                                                                                                                                |
| 2) Assess        | Determine the state of the literature (7, 28, 36), consultation with experts on health equity and that included the use of key informant interviews with interdisciplinary knowledge users(17).                                                                                                                                                                                                                                                                                         |
| 3) Develop/Adapt | Propose and debate adaptation of the reporting guideline: Following identification of diverse potential guideline users from high, middle and lower income countries including knowledge users such as patients and methodologists, were invited to participate in an online Delphi study to identify items for the reporting guideline (28), and a consensus meeting (the 2016 Boston Equity Symposium) held to discuss and debate evidence for inclusion in CONSORT-Equity 2017 (28). |
| 4) Disseminate   | Develop and execute plan for uptake of the reporting guideline Study outcomes are reflected in the success of an invitational study meeting (the 2016 Boston Equity Symposium) and co-authored publications (17, 18, 28, 36, 37) and the CONSORT-Equity 2017 checklist elaboration and explanation (28, 38).                                                                                                                                                                            |
| 5) Apply         | A process of road-testing the reporting guideline: Work is underway to further disseminate and promote the application of the CONSORT-Equity 2017 guideline.                                                                                                                                                                                                                                                                                                                            |

### Extent of knowledge user engagement

The use of the integrated KT approach facilitated engagement within the team by creating structures and opportunities for all team members to offer their views for the development of CONSORT-Equity (17, 28). We failed to engage with one advisory board member due to time constraints around their ability to participate; and it was not possible for every member of the team to have their views accommodated and some members chose to remove themselves from participation either temporarily or permanently (n=2). As well, it was not possible (and indicated as not desirable by members of the team) for every member to participate in every step of the

1  
2  
3 guideline development process, although opportunities to participate were actively welcomed  
4  
5 and sought by the facilitators. For the CONSORT-Equity 2017 study there are publications (see  
6  
7 Table 2) that document descriptions of the particular study processes, and that include  
8  
9 identification of who and how the team members were involved.  
10  
11  
12  
13

14  
15 As collaboration and consensus-building methods were a central feature in CONSORT-Equity  
16  
17 2017 development, it was also important to understand the experiences of all those who were  
18  
19 involved in the reporting guideline development. An eight-question on-line survey consisting of  
20  
21 two Likert and six open-ended questions about experience with integrated KT during the  
22  
23 CONSORT-Equity 2017 study was administered to team members. Twenty-four of the 37 team  
24  
25 members responded to the first two Likert questions on the survey (response rate of 65%). When  
26  
27 asked “Overall, how would you rate the extent to which the research team engaged you in the  
28  
29 study? (Where 1 is not at all satisfied and 5 is totally satisfied)” 18/24 (75%) of surveyed  
30  
31 respondents indicated “very or totally satisfied”. An illustrative quote was: “I had a concrete role  
32  
33 in the process and the team was very respectful and considerate of input so it was easy to feel  
34  
35 invested”. In response to the second Likert question “How satisfied are you with the level of  
36  
37 your engagement with the research team? (Where 1 is not at all satisfied and 5 is totally  
38  
39 satisfied)”, 21/24 (87.5%) of the respondents indicated “very or totally satisfied”. An illustrative  
40  
41 quote from this response was: “[I would] be happy (very) if all research teams engaged all  
42  
43 participants in the same manner”.  
44  
45  
46  
47  
48  
49  
50  
51  
52  
53  
54  
55  
56  
57  
58  
59  
60

Table 3. Results of two Likert questions on a team survey about experience with integrated knowledge translation (KT) approach (n=24)

| Question                                                                                             | Response category                               |                                               |                                         |                                              |                                                  | Illustrative quote from relevant open-ended questions                                                                             |
|------------------------------------------------------------------------------------------------------|-------------------------------------------------|-----------------------------------------------|-----------------------------------------|----------------------------------------------|--------------------------------------------------|-----------------------------------------------------------------------------------------------------------------------------------|
| Overall, how would you rate the extent to which the research team engaged you in the project. (n=24) | 1<br>(not at all satisfied):<br><br>n=0<br>(0%) | 2<br>(somewhat satisfied):<br><br>n=2<br>(8%) | 3<br>(satisfied):<br><br>n=4<br>(16.6%) | 4<br>(very satisfied):<br><br>n=3<br>(12.5%) | 5<br>(totally satisfied):<br><br>n=15<br>(62.5%) | “I had a concrete role in the process and the team was very respectful and considerate of input so it was easy to feel invested”. |
| How satisfied are you with the level of your engagement with the research team. (n=24)               | 1<br>(not at all satisfied):<br><br>n=1<br>(4%) | 2<br>(somewhat satisfied):<br><br>n=0<br>(0%) | 3<br>(satisfied):<br><br>n=2<br>(8%)    | 4<br>(very satisfied):<br><br>n=3<br>(12.5%) | 5<br>(totally satisfied):<br><br>n=18<br>(75%)   | “[I would] be happy (very) if all research teams engaged all participants in the same manner”.                                    |

In the portion of the survey that included six open-ended questions, respondents were asked to provide details about their experience with integrated KT during the CONSORT-Equity 2017 study. Frequency counts of the type of responses were recorded and are reported in Table 3 with example quotes.

1  
2  
3 When participants were asked what they perceived as the benefits of an integrated KT approach  
4 (question 1), the most common (14/25; 56%) response described integrated KT as an approach  
5 that allows multiple voices/opinions to be heard and considered. In response to being asked  
6 about whether they thought that the team faced any challenges in the study as the result of the  
7 integrated KT approach (question 2), many participants (8/25; 32%) reported that the logistics  
8 involved with including lots of people was a challenge, but a slightly larger number (9/25; 36%)  
9 reported that they were unaware of any team challenges. When asked about whether they faced  
10 any challenges during the development of the reporting guideline as the result of the integrated  
11 KT approach (question 3), the vast majority of participants (19/25; 76%) indicated that they did  
12 not face any challenges.  
13  
14  
15  
16  
17  
18  
19  
20  
21  
22  
23  
24  
25  
26  
27

28 Participants were asked what they considered to be the impact(s) of using an integrated KT  
29 approach with reporting guideline development (question 4), and nearly a majority (11/25; 44%)  
30 indicated that an integrated KT approach improved the relevance of the final guideline product.  
31 When asked if they would change anything about how the integrated KT approach was used  
32 (question 5), few participants provided a response (n=15) and of those that did indicate a  
33 response, most participants (8/15; 53%) indicated that they would not have changed anything.  
34 Finally, when asked for additional comments (question 6), while most respondents (19/25; 76%)  
35 provided no comments, some (6/25; 24%) reported that the integrated KT process was a positive  
36 experience (Table 4).  
37  
38  
39  
40  
41  
42  
43  
44  
45  
46  
47  
48  
49  
50

51 During the CONSORT-Equity 2017 study, team members were found to be more engaged in  
52 particular activities in relation to their knowledge, and/or in relation to life events. The  
53  
54  
55  
56  
57



1  
2  
3 CONSORT-Equity 2017 study was voluntary for most team members – and so was unpaid work  
4  
5 – and other duties and personal factors (for example, health issues) meant that participation was  
6  
7 not always an option for team members.  
8  
9

10  
11  
12 Table 4. Results of six open-ended questions on a team survey about experience with integrated  
13  
14 knowledge translation (KT) approach (n=25).  
15  
16  
17

| Question                                                                                                                                                       | Response                                                                                                                                                                                                                                                                                                                                                                                                                                                                                                                                           |
|----------------------------------------------------------------------------------------------------------------------------------------------------------------|----------------------------------------------------------------------------------------------------------------------------------------------------------------------------------------------------------------------------------------------------------------------------------------------------------------------------------------------------------------------------------------------------------------------------------------------------------------------------------------------------------------------------------------------------|
| 1. What do you perceive as the benefits of an integrated knowledge translation (KT) approach to develop a reporting guideline extension of CONSORT for equity? | 1) Allows consideration and inclusion of a range of views (14/25; 56%): “Capturing a multitude of perspectives, to enhance relevance and acceptability of reporting guidelines across disciplines”.<br>2) Fosters engagement in study processes (6/25; 24%): “It allows participation and engagement of various stakeholders at all stages of the project for whom the guideline is relevant”.<br>3) Enhance guideline uptake (5/25; 20%): “Results are more likely to be adopted and applied”.                                                    |
| 2. Do you think that <u>the team</u> faced any challenges in the study as the result of the integrated KT approach?                                            | 1) The logistics of including a range of people in the team (8/25; 32%): “Takes more time to work with a large and diverse crowd”.<br>2) Management of views (5/25; 20%): “Because of the wide range of different disciplines present, it may have been difficult to engage all participants equally across all issues”.<br>3) Reconciliation of within-team differences (3/25; 12%): “It is difficult to deal with perhaps conflicting and at times unclear opinions”.<br>4) Unaware of any team challenges (9/25; 36%): “Not that I'm aware of”. |
| 3. Did <u>you</u> face any challenges in the study as the result of the integrated KT approach?                                                                | 1) No personal challenges faced in the study (19/25; 76%): “I did not face any challenges. My input and participation had equal standing in the process”.<br>2) The personal experience of challenge related to the pace, number of consultations, and/or to provide informed opinions (6/25; 24%): “It was slow at times and a bit frustrating. We achieved what we did through patience, persistence and good will of team members”.                                                                                                             |
| 4. What do you consider to                                                                                                                                     | 1) Improves the final guideline product (11/25; 44%): “I feel                                                                                                                                                                                                                                                                                                                                                                                                                                                                                      |

|                                                                                                                    |                                                                                                                                                                                                                                                                                                                                                                                                                                                                          |
|--------------------------------------------------------------------------------------------------------------------|--------------------------------------------------------------------------------------------------------------------------------------------------------------------------------------------------------------------------------------------------------------------------------------------------------------------------------------------------------------------------------------------------------------------------------------------------------------------------|
| <p>be the impact(s) of using an integrated KT approach with the study?</p>                                         | <p>that we produced a product that was relevant to all of our team members, and that they can support in their communities”.<br/> 2) Inclusion of different forms of knowledge (11/25; 44%): “It ensures that the study is better informed by the expertise, perspectives and needs of the different stakeholders”.<br/> 3) Unsure/did not notice impact of integrated KT approach (3/25; 12%): “Not sure”.</p>                                                          |
| <p>5. Would you have changed anything about how the integrated KT approach was used in the study? If yes, how?</p> | <p>1) Would not change the use of the integrated KT approach (8/15; 53%): “No change suggested”.<br/> 2) Greater range of participants (3/15; 20%): “I would have tried to broaden the scope of stakeholders”.<br/> 3) Narrow the stakeholder focus and seek more intense consultations, such as through in-person meetings (2/15; 13%): “Smaller reach, deeper consultation”.<br/> 4) More time (2/15; 13%): “More time is always a benefit to measure the impact”.</p> |
| <p>6. Do you have any additional comments?</p>                                                                     | <p>1) No comment (19/25; 76%).<br/> 2) Indicated that it was a positive experience (6/25; 24%): “I would do this again”.</p>                                                                                                                                                                                                                                                                                                                                             |

## DISCUSSION

The team engaged in mutually-agreed upon processes to co-create knowledge and assemble empirical evidence to develop a reporting guideline, CONSORT-Equity 2017. The team was established to function as a partnership throughout the study process to promote inclusion and respect for a range of views. A structured integrated KT approach was used to organize ongoing negotiations and replicable steps that occurred within the team. The aim was to ensure that the goals of the study were achieved: to conduct research in a collaborative manner that uses consensus-building methods and involves co-creation of knowledge; and, to develop a reporting guideline for equity (CONSORT-Equity 2017) as a contribution to address health systems equity issues.

## Perceptions of the integrated KT approach and impacts on co-creation of knowledge

Our study involved an interdisciplinary advisory board-researcher collaboration and included patient and members of the public, with 38 members from eight countries who collaborated in the development of CONSORT-Equity. Details on the team members and study processes are reported in detail elsewhere (7, 28). There is little evidence in the literature about the experiences of interdisciplinary teams that include patients, members of the public, journal editors, trialists, bioethicists, clinicians, systematic review authors, policy makers, and funders. Previous studies that investigate patient perspectives on their involvement in clinical guideline development concluded that effective engagement requires planning, and the recommendations arising from that work include: the use of smaller and more diverse groups, with no prior relationships with other members of the team; individual and group preparation for engagement on the team; and, an identified contact person for participants (39).

Many options exist to facilitate collaboration within research partnerships and that foster democratic approaches to knowledge creation (23, 40-42). Integrated KT was identified as appropriate for our study, as it focuses on the co-creation of knowledge with practical applications (23). Furthermore, we found that an integrated KT approach provided many opportunities to be fully involved in the entire research process and as had been planned for during protocol development (7). Such an approach begins with an iterative process of preparation for participation in research partnerships, a feature reported in other frameworks that structure knowledge user engagement in health research (41, 43, 44). The members of the team were invited to participate in all phases of the reporting guideline development process, and efforts were made to accommodate their participation. Evidence for the value of knowledge user

1  
2  
3 engagement in reporting guideline development is asserted in a sub-study conducted with  
4  
5 interdisciplinary key informants. This study, which engaged key informants in interviews about  
6  
7 their views and suggestions for an extension of CONSORT for equity, generated new concepts  
8  
9 that contributed to the development of CONSORT-Equity 2017 (17). We prioritized the  
10  
11 engagement of team members throughout the CONSORT-Equity 2017 study to improve the  
12  
13 likelihood that CONSORT-Equity 2017 would be perceived as useful and applicable in practice.  
14  
15 To strive for authentic (that is, ethical, equitable) engagement, deliberate efforts were made to  
16  
17 foster relationships among the broad range of knowledge users and researchers.  
18  
19  
20  
21  
22  
23

24 The success of the longer-term engagement of team members was possibly due to the structured  
25  
26 integrated KT approach that fostered processes of negotiation and created opportunities for team  
27  
28 members to choose their level of engagement. For example, there were ongoing opportunities for  
29  
30 members of the collaboration to engage at different stages of the CONSORT-Equity 2017 study.  
31  
32 These opportunities were initially identified during the preparation for the CONSORT-Equity  
33  
34 2017 study. The iterative and prolonged focus on preparation of the researchers and knowledge  
35  
36 users led to the development of a shared agenda for the CONSORT-Equity 2017 study. The  
37  
38 finding of a focus on iterative preparation is an innovation on the original framework used to  
39  
40 guide the integrated KT approach (Figure 1). The opportunity to prepare advisory board  
41  
42 members and researchers to engage in the CONSORT-Equity 2017 study and to work together  
43  
44 led to opportunities to develop and make shared understandings and agreements explicit. The  
45  
46 facilitators of the advisory board and researchers built on the success of the initial engagement of  
47  
48 team members in the reporting guideline development, and created frequent and varied  
49  
50 opportunities for ongoing participation in the CONSORT-Equity 2017 study processes (for  
51  
52  
53  
54  
55  
56  
57  
58  
59  
60

1  
2  
3 example, through scheduled face-to-face and/or telephone calls, maintained regular email study  
4  
5 updates).

6  
7  
8  
9  
10 The experience with varied levels of engagement by team members in the CONSORT-Equity  
11  
12 2017 study led to consideration of the meaning of “engagement” among an interdisciplinary  
13  
14 team of knowledge users and researchers. Overall, a committed group of team members were  
15  
16 involved in a collaborative effort for the duration of the CONSORT-Equity 2017 study. They  
17  
18 met and agreed upon study objectives and this in turn resulted in co-created products. However,  
19  
20 during the series of CONSORT-Equity 2017 studies the nature and degree of engagement varied  
21  
22 over time and according to the capacity of team members and study tasks. Team members:  
23  
24 asking to be kept informed but not wanting to actively participate (for example, one-way  
25  
26 direction of information updates on the study such as an email with announcements); being  
27  
28 consulted for feedback (for example, responding to an email request for information or feedback  
29  
30 on a document); supporting others who provide governance in the CONSORT-Equity 2017 study  
31  
32 processes (for example, providing support in a study in response to requests by team leads);  
33  
34 sharing in the governance of the study (for example, advising and/or decision making in a co-  
35  
36 leading role, such as in development of CONSORT-Equity 2017 study directions or products),  
37  
38 to, in some instances and for particular topics, leading the process (for example, knowledge users  
39  
40 who are thought leaders on topics taking the lead and directing other members of the team –  
41  
42 including researchers – in the study to support their initiatives). The different levels at which  
43  
44 knowledge user engagement may occur has been under examination for many years, one of the  
45  
46 earliest instances is Arnstein’s 1969 ladder of participation and that ranges from non-  
47  
48 participation to citizen control (45). Since then there have been many other ways of  
49  
50  
51  
52  
53  
54  
55  
56  
57  
58  
59  
60

1  
2  
3 conceptualizing knowledge user engagement in research (46-48). During our CONSORT-Equity  
4  
5 2017 study, we accomplished engagement of knowledge users in study governance – and then  
6  
7 exceeded this aim with knowledge user leadership. There are documented instances of  
8  
9 knowledge users taking the lead during parts of the CONSORT-Equity 2017 study conduct and  
10  
11 that occurred during meetings (for example, expert knowledge user leads taking initiative with  
12  
13 and guiding sessions at the Boston Equity Symposium) and with study publications (37). The  
14  
15 range of engagement that was observed during the CONSORT-Equity 2017 study processes  
16  
17 demonstrate that engagement may be more changeable and nuanced –and less able to be  
18  
19 anticipated - than is currently described in the literature encouraging knowledge user engagement  
20  
21 (12, 47). The use of the structured integrated KT approach allowed members of the team to  
22  
23 determine how and in what capacity they would contribute, while also being engaged to co-  
24  
25 create a reporting guideline.  
26  
27  
28  
29  
30  
31  
32

### 33 **Limitations and strengths of the integrated KT approach**

34  
35 The main limitations (challenges) of an integrated KT approach were identified by members of  
36  
37 the team on the survey and found to be the logistics of including a range of people in the study,  
38  
39 and the management of their views. The facilitators of the advisory board and researchers  
40  
41 reflected on the logistics and the challenges of scheduling meetings to accommodate or align  
42  
43 with work roles (outside of CONSORT-Equity) and time constraints for those on the team to  
44  
45 participate in the study. As well, there may have been impacts on participation of team members  
46  
47 due to the reliance upon the facilitators who were based at one site and responsible for fostering  
48  
49 regular and productive contacts, and with the use of online communications (versus face-to-face  
50  
51 meetings). For example, communication between and within those on the team was a challenge  
52  
53  
54  
55  
56  
57  
58  
59  
60

1  
2  
3 due to the logistics of time zones, the numbers of people, limitations of technology. These  
4  
5 challenges were further complicated by the need to bring views of the group together in  
6  
7 consensus to achieve CONSORT-Equity 2017 study objectives. The surveyed members of the  
8  
9 team identified the main strength of the integrated KT approach to be the consideration and  
10  
11 inclusion of a range of views in the research process. The facilitators of the team reflected on the  
12  
13 use of study processes structured by the integrated KT approach that, for the duration of the  
14  
15 study, make it possible to build and/or strengthen research relationships initiated at the start of  
16  
17 the study and across a range of team members. These research relationships were demonstrated  
18  
19 by participation in publication co-authorship, attendance at regular meetings, email contacts, and  
20  
21 feedback on products.  
22  
23  
24  
25  
26  
27

### 28 **Limitations of the study about the integrated KT approach**

30  
31 Limitations of the study reported in this paper include that the work was done with a smaller  
32  
33 group of diverse team members, and that all team members shared an interest in the work related  
34  
35 to the development of a reporting guideline (CONSORT-Equity 2017). For this reason, the  
36  
37 findings about the integrated KT process presented here have not been documented in this way  
38  
39 before, and may not be relevant to other teams that consist of a different groups of team  
40  
41 members, and that have different team objectives. In addition, the methods we used are  
42  
43 observational and not established for use with teams who are engaged in multiple series of  
44  
45 studies to develop an end-product (in our instance, a reporting guideline).  
46  
47  
48  
49  
50

### 51 **CONCLUSIONS**

52  
53  
54  
55  
56  
57  
58  
59  
60

1  
2  
3 A structured integrated KT approach was successfully used to engage knowledge users with  
4 researchers in a mixed-method study to develop a reporting guideline, CONSORT-Equity 2017.  
5  
6 The CONSORT-Equity 2017 study was governed by an interdisciplinary advisory board  
7  
8 populated by knowledge users and a group of researchers, in an advisory board-researcher  
9  
10 collaboration. The use of an integrated KT approach fostered engagement of the advisory board  
11  
12 – researcher collaboration in the study processes and prompted deliberation and consensus  
13  
14 building among team members. Further work is needed to examine the collaborative framework  
15  
16 components and its potential applications to other initiatives that engage researchers with  
17  
18 knowledge users interested in and seeking to improve research reporting guidelines.  
19  
20  
21  
22  
23  
24  
25

26 [Figure 1. Integrated Knowledge Translation (KT) approach for CONSORT-Equity 2017]  
27  
28  
29  
30

31 **Ethics Approval:** Participants gave informed consent before taking part in the study of the  
32  
33 integrated KT approach used in the development of the CONSORT-Equity 2017 reporting  
34  
35 guideline reported in this manuscript (Bruyère REB Protocol # M16-15-042).  
36  
37  
38  
39

40 **Transparency Statement:** The lead author and guarantor (JJ) affirms that the manuscript is an  
41  
42 honest, accurate, and transparent account of the study being reported; that no important aspects  
43  
44 of the study have been omitted. There were no deviations from what was planned.  
45  
46  
47  
48

49 **Role of funding source:** Funding was not received for this study.  
50  
51  
52  
53

54 **Data sharing statement:** No additional data available.  
55  
56  
57  
58  
59  
60



1  
2  
3  
4  
5 **Competing interests:** All authors have completed the Unified Competing Interest form  
6 (available on request from the corresponding author) and declare: no support from any  
7  
8 organization for the submitted work; no financial relationships with any organizations that might  
9  
10 have an interest in the previous three years; no other relationships or activities that could appear  
11  
12 to have influenced the submitted work, with the following exceptions: 1) Dr. Cuervo reports he  
13  
14 works as a Senior Advisor for Health Systems Research to the Pan American Health  
15  
16 Organization/World Health Organization. His Organization's Policy on Research for Health calls  
17  
18 for the development and use of research reporting standards and improving the value and impact  
19  
20 of research for health. His opinions and contributions to this manuscript are his own and do not  
21  
22 necessarily reflect the decisions or policies of his employer; 2) Dr. Moher reports that he is one  
23  
24 of the 'inventors' of CONSORT; 3) Dr. Welch reports grants from Canadian Institutes of Health  
25  
26 Research, grants from Ontario Early Career Researcher Award, during the conduct of the study.  
27  
28  
29  
30  
31  
32  
33  
34

35 **Contributorship Statement:** JJ, IDG, VW conceived and led the design of the work described  
36  
37 in the manuscript and were responsible for the first and final drafts of this manuscript. EJ,  
38  
39 DM,JP, MY, PT, VW and members of the CONSORT-Equity 2017 and Boston Equity  
40  
41 Symposium coauthors participated in and provided substantial contributions to the analysis and  
42  
43 interpretation during development of the work described in the manuscript. JJ led writing of the  
44  
45 first version of the manuscript. JJ and IDG revised the manuscript. EJ, DM,JP, MY, PT, VW  
46  
47 made contributions to drafts of this manuscript including the listed members of the CONSORT-  
48  
49 Equity 2017 and Boston Equity Symposium, and have reviewed and revised the manuscript for  
50  
51 important intellectual content and approved the final version of the manuscript.  
52  
53  
54  
55  
56  
57  
58  
59  
60

1  
2  
3  
4  
5 Dr. Janet Jull is the guarantor of the article.  
6  
7  
8  
9  
10

### 11 **Acknowledgements**

12 Collaborating authors who are identified as a member of the CONSORT-Equity and Boston  
13 Equity Symposium participants are as follows: Rebecca Armstrong, Sarah Baird, Yvonne Boyer,  
14 Luis Gabriel Cuervo, Regina Greer-Smith, Anne Lyddiatt, Jessie McGowan, Lawrence  
15 Mbuagbaw, Tomas Pantoja, Beverly Shea, Bjarne Robberstad, Howard White, George Wells.  
16 Reporting of involvement of patients and public is included here.  
17  
18

19 We thank the following individuals for their support and encouragement: Mark Petticrew,  
20 Jeremy Grimshaw, Charles Weijer, Monica Taljaard, Yukiko Asada.  
21  
22

23 JJ held a Canadian Institutes of Health Research (CIHR) Postdoctoral Fellowship for a portion of  
24 the time she was writing the paper.  
25

26 IDG is a recipient of a CIHR foundation grant (FDN# 143237).  
27  
28  
29  
30  
31  
32  
33

### 34 **References- to be finalized**

- 35 1. World Health Organization (WHO) Assembly. WHO Strategy on Research for Health;  
36 WHO Roles and responsibilities on health research: document WHA63.22 and Resolution. 20  
37 Avenue Appia, 1211 Geneva 27, Switzerland; 2012.
- 38 2. Pan American Health Organization, DC, 61st Session of the Regional Committee of  
39 WHO for the Americas. Policy on research for health : document CD49/10. Washington, DC:  
40 PAHO; 2009.
- 41 3. Glasziou P, Altman DG, Bossuyt P, Boutron I, Clarke M, Julious S, et al. Reducing waste  
42 from incomplete or unusable reports of biomedical research. *Lancet*. 2014;383(9913):267-76.
- 43 4. EQUATOR Network. The EQUATOR Network: Enhancing the Quality and  
44 Transparency of Health Research Centre for Statistics in Medicine (CSM), NDORMS,  
45 University of Oxford.: UK EQUATOR Centre; n.d. [Available from: [https://www.equator-](https://www.equator-network.org/)  
46 [network.org/](https://www.equator-network.org/).  
47
- 48 5. Centre for Journalology. Using Reporting Guidelines Ottawa Hospital Research  
49 Institute2019 [Available from: <http://www.ohri.ca/journalology/docs/guidelines.aspx>.  
50
- 51 6. Turner L, Shamseer L, Altman DG, Schulz KF, Moher D. Does use of the CONSORT  
52 Statement impact the completeness of reporting of randomised controlled trials published in  
53 medical journals? A Cochrane review. *Syst Rev*. 2012;1:60.  
54  
55  
56  
57  
58  
59  
60

7. Welch V, Jull J, Petkovic J, Armstrong R, Boyer Y, Cuervo LG, et al. Protocol for the development of a CONSORT-equity guideline to improve reporting of health equity in randomized trials. *Implement Sci.* 2015;10:146.
8. Whitehead M. The concepts and principles of equity and health. *Int J Health Serv.* 1992;22(3):429-45.
9. Sackett D, Rosenberg W, Gray JA, Haynes RB, Richardson WS. Evidence based medicine: what it is and what it isn't. *BMJ.* 1996;312:71-2.
10. Marmot M, Allen J, Bell R, Goldblatt P. Building of the global movement for health equity: from Santiago to Rio and beyond. *Lancet.* 2012;379(9811):181-8.
11. Lorenc T, Petticrew M, Welch V, Tugwell P. What types of interventions generate inequalities? Evidence from systematic reviews. *J Epidemiol Community Health.* 2013;67(2):190-3.
12. Canadian Institutes of Health Research (CIHR). Patient Engagement: What is patient engagement? Government of Canada 2018 [Available from: <http://www.cihr-irsc.gc.ca/e/45851.html>].
13. Jarrett L, Patient Involvement Unit (PIU) PIU. Patient Involvement Unit (PIU). A report on a study to evaluate patient/ carer membership of the first NICE Guideline Development Groups. London: National Institute for Clinical Excellence (NICE); 2004.
14. Qaseem A, Forland F, Macbeth F, Ollenschläger G, Phillips S, van der Wees P, et al. Guidelines International Network: toward international standards for clinical practice guidelines. *Ann Intern Med.* 2012;156(7):525-31.
15. Armstrong MJ, Bloom JA. Patient involvement in guidelines is poor five years after institute of medicine standards: review of guideline methodologies. *Res Involv Engagem.* 2017;3:19.
16. Moher D, Schulz KF, Simera I, Altman DG. Guidance for developers of health research reporting guidelines. *PLoS Med.* 2010;7(2):e1000217.
17. Jull J, Petticrew M, Kristjansson E, Yoganathan M, Petkovic J, Tugwell P, et al. Engaging knowledge users in development of the CONSORT-Equity 2017 reporting guideline: a qualitative study using in-depth interviews. *Res Involv Engagem.* 2018;4:34.
18. Jull J, Whitehead M, Petticrew M, Kristjansson E, Gough D, Petkovic J, et al. When is a randomised controlled trial health equity relevant? Development and validation of a conceptual framework. *BMJ Open.* 2017;7(9):e015815.
19. Graham ID, Logan J, Harrison MB, Straus SE, Tetroe J, Caswell W, et al. Lost in knowledge translation: time for a map? *J Contin Educ Health Prof.* 2006;26(1):13-24.
20. Canadian Institutes of Health Research (CIHR). Guide to knowledge translation planning at CIHR: integrated and end-of-grant approaches 2015 [Available from: <http://www.cihr-irsc.gc.ca/e/45321.html>].
21. Van de Ven D, Johnson P. Knowledge for theory and practice. *Academy of Management Review.* 2006;31(4):802-21.
22. Bowen S, Graham I. Integrated Knowledge Translation. In: SE Straus, J Tetroe, ID Graham, editors. *Knowledge Translation in Healthcare: moving evidence to practice.* West Sussex: Wiley; 2013. p. 14-23.
23. Jull J, Giles A, Graham ID. Community-based participatory research and integrated knowledge translation: advancing the co-creation of knowledge. *Implement Sci.* 2017;12(1):150.

24. Guest G NE, Mitchell ML. Collecting Qualitative Data: A Field Manual for Applied Research. 2013 2019/02/16. 55 City Road, London: SAGE Publications, Ltd; [75-112]. Available from: <http://methods.sagepub.com/book/collecting-qualitative-data>.
25. Jull J, Giles A, Boyer Y, Stacey D, Minwaashin Lodge. Building and enacting ethical research processes: the example of culturally adapting a decision making strategy. ACME: An International Journal for Critical Geographies. 2016.
26. Jull J, CONSORT-Equity Team. The value of an integrated knowledge translation approach for developing reporting guidelines: engaging knowledge users interested in equity-relevant decision making. Knowledge Translation Canada Scientific Meeting Toronto, Ontario, Toronto, Ontario 2016.
27. Morse J, Field P. Nursing research : the application of qualitative approaches. London: Chapman & Hall; 1996.
28. Welch VA, Norheim OF, Jull J, Cookson R, Sommerfelt H, Tugwell P, et al. CONSORT-Equity 2017 extension and elaboration for better reporting of health equity in randomised trials. BMJ. 2017;359:j5085.
29. Staniszewska S, Brett J, Simera I, Seers K, Mockford C, Goodlad S, et al. GRIPP2 reporting checklists: tools to improve reporting of patient and public involvement in research. Res Involv Engagem. 2017;3:13.
30. Canadian Institutes of Health Research, Natural Sciences and Engineering Research Council of Canada, and Social Sciences and Humanities Research Council of Canada. *Tri-Council Policy Statement: Ethical Conduct for Research Involving Humans* 2018 [Available from: [http://www.pre.ethics.gc.ca/pdf/eng/tcps2/TCPS\\_2\\_FINAL\\_Web.pdf](http://www.pre.ethics.gc.ca/pdf/eng/tcps2/TCPS_2_FINAL_Web.pdf)].
31. Petticrew M, Whitehead M, Macintyre SJ, Graham H, Egan M. Evidence for public health policy on inequalities: 1: the reality according to policymakers. J Epidemiol Community Health. 2004;58(10):811-6.
32. International Committee of Medical Journal Editors (ICJME). Defining the role of authors and contributors 2018 [Available from: <http://www.icmje.org/recommendations/browse/roles-and-responsibilities/defining-the-role-of-authors-and-contributors.html>].
33. Panel on Research Ethics. TCPS 2 – Chapter 9. Research Involving the First Nations, Inuit and Métis Peoples of Canada [Available from: <http://www.pre.ethics.gc.ca/eng/policy-politique/initiatives/tcps2-eptc2/chapter9-chapitre9/>].
34. First Nations Information Governance Centre (FNIGC). The First Nations principles of OCAP® 2017 [Available from: <http://fnigc.ca/ocap.html>].
35. Canadian Institutes of Health Research (CIHR). CIHR guidelines for health research involving Aboriginal People. 2007 [Available from: <http://www.cihr-irsc.gc.ca/e/29134.html>].
36. Petkovic, Welch V, Jull J, Petticrew M, Kristjansson E, Radar T, et al. How is health equity reported and analyzed in randomised trials: Cochrane Systematic Review Registered Protocol. Cochrane Methodology Review Group. 2017(Issue 8 . Art. No.: MR000046).
37. Mbuagbaw L, Aves T, Shea B, Jull J, Welch V, Taljaard M, et al. Considerations and guidance in designing equity-relevant clinical trials. Int J Equity Health. 2017;16(1):93.
38. Simera I, Moher D, Hirst A, Hoey J, Schulz KF, Altman DG. Transparent and accurate reporting increases reliability, utility, and impact of your research: reporting guidelines and the EQUATOR Network. BMC Med. 2010;8:24.

- 1
- 2
- 3
- 4 39. Armstrong MJ, Mullins CD, Gronseth GS, Gagliardi AR. Recommendations for patient
- 5 engagement in guideline development panels: A qualitative focus group study of guideline-naïve
- 6 patients. *PLoS One*. 2017;12(3):e0174329.
- 7 40. West JF. Public health program planning logic model for community engaged type 2
- 8 diabetes management and prevention. *Eval Program Plann*. 2014;42:43-9.
- 9 41. James S, Arniella G, Bickell NA, Walker W, Robinson V, Taylor B, et al. Community
- 10 ACTION boards: an innovative model for effective community-academic research partnerships.
- 11 *Prog Community Health Partnersh*. 2011;5(4):399-404.
- 12 42. May M, Law J. CBPR as community health intervention: institutionalizing CBPR within
- 13 community based organizations. *Prog Community Health Partnersh*. 2008;2(2):145-55.
- 14 43. Johnson DS, Bush MT, Brandzel S, Wernli KJ. The patient voice in research-evolution of
- 15 a role. *Res Involv Engagem*. 2016;2:6.
- 16 44. Jinks C, Carter P, Rhodes C, Taylor R, Beech R, Dziedzic K, et al. Patient and public
- 17 involvement in primary care research - an example of ensuring its sustainability. *Res Involv*
- 18 *Engagem*. 2016;2:1.
- 19 45. Arnstein S. A ladder of citizen participation. *Journal of the American Planning*
- 20 *Association*. 1969;35(4):216-24.
- 21 46. INVOLVE. NIHR INVOLVE 2001 [Available from: <https://www.invo.org.uk/>].
- 22 47. Sheridan S, Schrandt S, Forsythe L, Hilliard TS, Paez KA, panel) Advisory Panel on
- 23 Patient Engagement. The PCORI Engagement Rubric: Promising Practices for Partnering in
- 24 Research. *Ann Fam Med*. 2017;15(2):165-70.
- 25 48. Forsythe LP, Ellis LE, Edmundson L, Sabharwal R, Rein A, Konopka K, et al. Patient
- 26 and stakeholder engagement in the PCORI pilot projects: description and lessons learned. *J Gen*
- 27 *Intern Med*. 2016;31.
- 28
- 29
- 30
- 31
- 32
- 33
- 34
- 35
- 36
- 37
- 38
- 39
- 40
- 41
- 42
- 43
- 44
- 45
- 46
- 47
- 48
- 49
- 50
- 51
- 52
- 53
- 54
- 55
- 56
- 57
- 58
- 59
- 60

1  
2  
3  
4  
5  
6  
7  
8  
9  
10  
11  
12  
13  
14  
15  
16  
17  
18  
19  
20  
21  
22  
23  
24  
25  
26  
27  
28  
29  
30  
31  
32  
33  
34  
35  
36  
37  
38  
39  
40  
41  
42  
43  
44  
45  
46  
47  
48  
49  
50  
51  
52  
53  
54  
55  
56  
57  
58  
59  
60

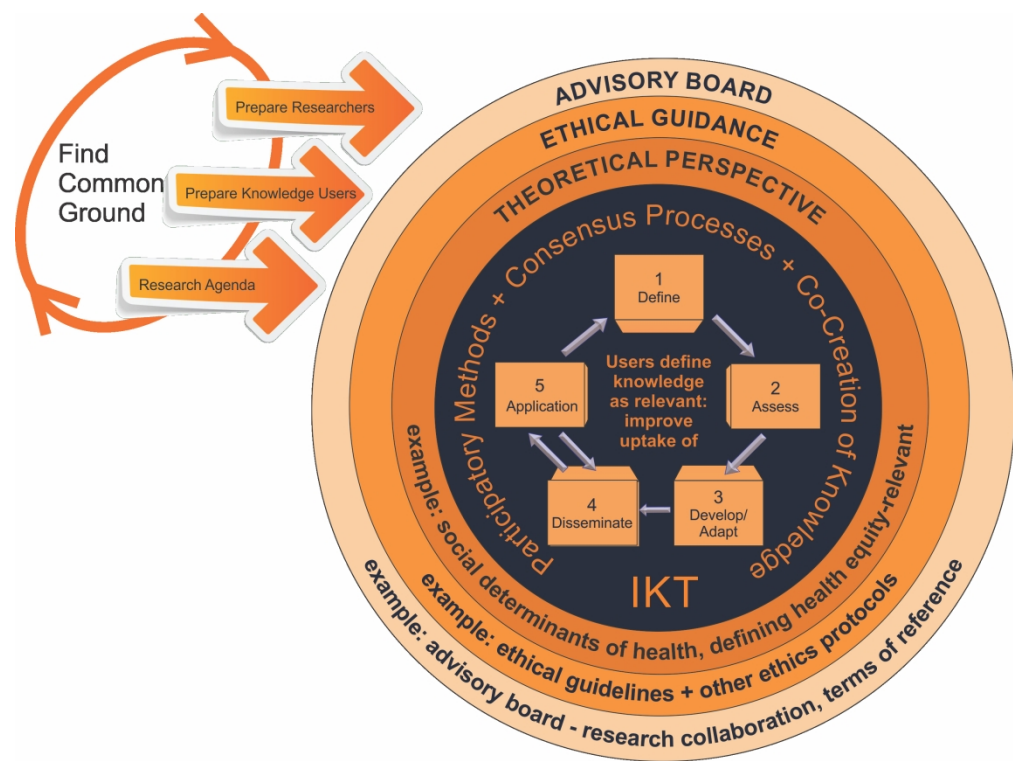

Figure 1.

# BMJ Open

## Taking an integrated knowledge translation approach in research to develop the CONSORT-Equity 2017 reporting guideline: An observational study

|                                 |                                                                                                                                                                                                                                                                                                                                                                                                                                                                                                                                                                                          |
|---------------------------------|------------------------------------------------------------------------------------------------------------------------------------------------------------------------------------------------------------------------------------------------------------------------------------------------------------------------------------------------------------------------------------------------------------------------------------------------------------------------------------------------------------------------------------------------------------------------------------------|
| Journal:                        | <i>BMJ Open</i>                                                                                                                                                                                                                                                                                                                                                                                                                                                                                                                                                                          |
| Manuscript ID                   | bmjopen-2018-026866.R2                                                                                                                                                                                                                                                                                                                                                                                                                                                                                                                                                                   |
| Article Type:                   | Research                                                                                                                                                                                                                                                                                                                                                                                                                                                                                                                                                                                 |
| Date Submitted by the Author:   | 29-May-2019                                                                                                                                                                                                                                                                                                                                                                                                                                                                                                                                                                              |
| Complete List of Authors:       | Jull, Janet; Queen's University, School of Rehabilitation Therapy; Ottawa Hospital Research Institute,<br>Graham, Ian; Ottawa Hospital Research Institute,<br>Kristjansson, Elizabeth; University of Ottawa, Institute of Population Health<br>Moher, David; Ottawa Hospital Research Institute, Ottawa Methods Centre<br>Petkovic, Jennifer; University of Ottawa, Bruyere Research Institute<br>Yoganathan, Manosila; Elisabeth Bruyere Research Institute<br>Tugwell, Peter; University of Ottawa, medicine<br>Welch, Vivian A.; University of Ottawa, Institute of Population Health |
| <b>Primary Subject Heading</b>: | Research methods                                                                                                                                                                                                                                                                                                                                                                                                                                                                                                                                                                         |
| Secondary Subject Heading:      | Evidence based practice                                                                                                                                                                                                                                                                                                                                                                                                                                                                                                                                                                  |
| Keywords:                       | health equity, reporting guidelines, CONSORT, integrated knowledge translation, collaborative research, research co-creation                                                                                                                                                                                                                                                                                                                                                                                                                                                             |
|                                 |                                                                                                                                                                                                                                                                                                                                                                                                                                                                                                                                                                                          |

SCHOLARONE™  
Manuscripts

1  
2  
3 **Title:** Taking an integrated knowledge translation approach in research to develop the  
4 CONSORT-Equity 2017 reporting guideline: An observational study  
5  
6  
7

8 Janet Jull

9 Assistant Professor, School of Rehabilitation Therapy, Queens University, Kingston, Ontario,  
10 Canada; Affiliate Investigator, Ottawa Hospital Research Institute, Ottawa, Ontario, Canada  
11 [janet.jull@queensu.ca](mailto:janet.jull@queensu.ca)  
12

13 Ian D Graham

14 Senior Scientist, Clinical Epidemiology Program, Ottawa Hospital Research Institute; Professor,  
15 School of Epidemiology and Public Health, University of Ottawa, Ottawa, Ontario, Canada  
16 [igraham@ohri.ca](mailto:igraham@ohri.ca)  
17  
18

19 Elizabeth Kristjansson

20 Associate Professor, Centre for Research on Educational and Community Services, School of  
21 Psychology, University of Ottawa, Ottawa, Ontario, Canada  
22 [kristjan@uottawa.ca](mailto:kristjan@uottawa.ca)  
23  
24

25 David Moher

26 Senior Scientist, Clinical Epidemiology Program, Ottawa Hospital Research Institute, Ottawa,  
27 Ontario, Canada; Associate Professor, School of Epidemiology, Public Health and Preventive  
28 Medicine, University of Ottawa, Ottawa, Ontario, Canada.  
29 [dmoher@ohri.ca](mailto:dmoher@ohri.ca)  
30  
31

32 Jennifer Petkovic

33 Coordinator, Campbell and Cochrane Equity Methods Group, Bruyère Research Institute,  
34 Bruyère Continuing Care and University of Ottawa, Ottawa, Ontario, Canada  
35 [jennifer.petkovic@uottawa.ca](mailto:jennifer.petkovic@uottawa.ca)  
36  
37

38 Manosila Yoganathan

39 Coordinator, Bruyère Research Institute, Bruyère Continuing Care and University of Ottawa,  
40 Ottawa, Ontario, Canada  
41 [y.manosilah@gmail.com](mailto:y.manosilah@gmail.com)  
42  
43

44 Peter Tugwell

45 Senior Scientist, Clinical Epidemiology Program, Ottawa Hospital Research Institute, Ottawa,  
46 Ontario, Canada; Professor, Department of Medicine, Faculty of Medicine, University of Ottawa,  
47 Ottawa, Ontario, Canada; Professor, School of Epidemiology and Public Health, Faculty of  
48 Medicine, University of Ottawa, Ottawa, Ontario, Canada  
49 [ptugwell@uottawa.ca](mailto:ptugwell@uottawa.ca)  
50  
51

52 Vivian Welch

53 Scientist, Methods Centre, Bruyère Research Institute, Bruyère Continuing Care and University  
54 of Ottawa, Ottawa, Ontario, Canada,  
55  
56  
57  
58  
59  
60



1  
2  
3 vwelch@campbellcollaboration.org  
4

5 AND

6 Members of the CONSORT-Equity 2017 and Boston Equity Symposium.  
7  
8  
9

10 **Corresponding Author:** Dr. Janet Jull, janet.jull@queensu.ca  
11  
12  
13  
14  
15  
16  
17  
18  
19  
20  
21  
22  
23  
24  
25  
26  
27  
28  
29  
30  
31  
32  
33  
34  
35  
36  
37  
38  
39  
40  
41  
42  
43  
44  
45  
46  
47  
48  
49  
50  
51  
52  
53  
54  
55  
56  
57  
58  
59  
60

For peer review only

**Abstract (299)**

**Objective** We describe the use of an integrated knowledge translation (KT) approach in the development of the CONSolidated Standards Of Reporting Trials extension for equity (“CONSORT-Equity 2017”), and advisory board-research team members’ (“the team”) perceptions of the integrated KT process.

**Design** An observational study to describe team processes and experience with a structured integrated KT approach to develop CONSORT-Equity 2017. Participant observation to describe team processes and a survey were used with the 38 team members.

**Setting** Use of the CONSORT health-research reporting guideline contributes to an evidence base for health systems’ decision-making, and CONSORT-Equity 2017 may improve reporting about health equity-relevant evidence. An integrated KT research approach engages knowledge users (those for whom the research is meant to be useful) with researchers to co-create research evidence and is more likely to produce findings that are applied in practice or policy.

**Participants** Researchers adopted an integrated KT approach and invited knowledge users to form a team.

**Results** An integrated KT approach was used in the development of CONSORT-Equity 2017 and structured replicable steps. The process for co-creating the reporting guideline involved two stages: 1) establishing guiding features for co-creation, and 2) research actions that supported the co-creation of the reporting guideline. Stage one consisted of four steps: finding common ground, forming an advisory board, committing to ethical guidance, clarifying theoretical research assumptions. Bound by the stage one guiding features of an integrated KT approach, stage two consisted of five steps during which studies for consensus-based reporting guidelines

1  
2  
3 were conducted. Of 38 team members, 25 (67.5%) completed a survey about their perceptions of  
4  
5 the integrated KT approach.  
6

7  
8 **Conclusions** An integrated KT approach can be used to engage a team to co-create reporting  
9  
10 guidelines. Further study is needed to understand the use of an integrated KT approach in  
11  
12 development of reporting guidelines.  
13

#### 14 15 **Strengths and limitations of this study**

- 16  
17 • Reporting guidelines in health research improve and contribute to a robust evidence base  
18  
19 for health systems decision-making  
20
- 21  
22 • Integrated knowledge translation (KT) is an approach to research that structures the  
23  
24 engagement of knowledge users, meaning those for whom the research is meant to  
25  
26 ultimately be of use, with researchers to facilitate the co-creation of knowledge  
27
- 28  
29 • An integrated KT approach was used to engage knowledge users with researchers as a  
30  
31 team, to develop the CONSolidated Standards Of Reporting Trials extension for equity  
32  
33 (“CONSORT-Equity 2017”) reporting guideline  
34
- 35  
36 • Limitations are that the use of an integrated KT approach includes the logistics of  
37  
38 including a range of people and the management of views; the strengths include that the  
39  
40 integrated KT approach allows consideration and inclusion of a range of views  
41
- 42  
43 • An integrated KT approach can be used to engage a team to co-create reporting  
44  
45 guidelines.  
46  
47  
48  
49  
50  
51  
52  
53  
54  
55  
56  
57  
58  
59  
60

## INTRODUCTION

Reporting guidelines in health research are important, as they improve and contribute to a more robust evidence base for health systems decision-making (1, 2). There is a significant amount of avoidable waste in research (3), and part of this waste can be attributed to potentially useful research findings being disregarded because of inadequate reporting, which reporting guidelines can help address. Defined as a tool for use by health researchers to structure manuscript writing, reporting guidelines consist of minimal lists of information to ensure that a manuscript can be understood by a reader, replicated by a researcher, used by a clinician to make a clinical decision and included in a systematic review (4). The use of reporting guidelines in health research may improve completeness and transparency of reported evidence from research studies. Many examples of reporting guidelines can be found at the Ottawa Hospital Research Institute's Centre for Journalology site at <http://www.ohri.ca/journalology/docs/guidelines.aspx> (5), as well as the Enhancing the QUALity and Transparency Of health Research (EQUATOR) network site at <https://www.equator-network.org/> (4).

The internationally recognized CONSolidated Standards Of Reporting Trials (CONSORT) statement is an evidence-based guideline consisting of 25 items to encourage completeness and transparency in reporting of randomized controlled trials ("randomized trials"). CONSORT is in the form of a checklist and flow diagram (6). The checklist focuses on reporting how the randomized trial was designed, analyzed and interpreted and the flow diagram depicts participant progress through the randomized trial processes. Extensions to the CONSORT Statement have been developed for specific issues (for example, pragmatic trials, non-pharmacologic therapies,

1  
2  
3 and social and psychological interventions) (4). No extension has yet been developed to report  
4 items to assess the effects of an intervention on health equity (7).  
5  
6  
7

8  
9  
10 Striving for health equity is a matter of social justice and implies that everyone can attain their  
11 health potential and that no one is disadvantaged by their social positioning or other socially  
12 determined circumstances (8). Randomized trials are a powerful design for determining the  
13 relative impact of an intervention (9). Nevertheless, for randomized trials to contribute  
14 effectively to policies that promote health equity, there remain challenges to overcome (10). For  
15 example, poor reporting of equity considerations for randomized trials can have undesired effects  
16 on health systems' organizational practices and policies, clinical and public care. Additionally,  
17 some interventions can even aggravate and/or undermine health equity (11). Reporting  
18 guidelines are needed to support the consideration of equity in the conduct of and  
19 communication about randomized trials.  
20  
21  
22  
23  
24  
25  
26  
27  
28  
29  
30  
31  
32  
33  
34

35 “Knowledge users” are those who influence, administer and/or who are active users of healthcare  
36 systems, and who for our study were identified as potential holders of expertise about or relevant  
37 to health, research and/or reporting guidelines. “Engagement” is defined here as an arrangement  
38 with knowledge users in the governance of the research process to co-lead research and that  
39 leads to co-creation of knowledge (beyond being a research participant) (12). While the  
40 engagement of knowledge users has been identified as important for clinical guideline  
41 development (13, 14), a recent review of clinical guidelines show that there is evidence for low  
42 levels of such engagement (15). Achieving consensus among developers of health research  
43 guidelines has been identified as important (16), but there is little information on how to achieve  
44  
45  
46  
47  
48  
49  
50  
51  
52  
53  
54  
55  
56  
57  
58  
59  
60

1  
2  
3 consensus when involving inter-disciplinary knowledge users that include patients and members  
4  
5 of the public in reporting guideline development (17).  
6

### 7 **“CONSORT-Equity 2017”**

8  
9  
10 Wishing to produce the highest quality reporting guideline and recognizing that the uptake of the  
11  
12 resulting reporting guideline would be critical to improving the reporting of future randomized  
13  
14 trials (18), between 2015 and 2017, an interdisciplinary group of knowledge users and  
15  
16 researchers came together as an advisory board-researcher team (“the team”) to develop an  
17  
18 equity extension of CONSORT, “CONSORT-Equity 2017” (7).  
19  
20  
21  
22  
23

24 Of particular concern to the team was the need to prompt careful consideration of the knowledge  
25  
26 translation issues that might promote uptake of the final reporting guideline product (that is, the  
27  
28 equity extension of the CONSORT guideline). “Knowledge translation” (KT) is a term used to  
29  
30 refer to processes that bridge the “know-do” gap which is defined as the gap between what is  
31  
32 learned from research and the implementation of what is learned by knowledge users, with the  
33  
34 aim to improve health delivery systems and health outcomes (19). Initially, know-do gaps (for  
35  
36 example, uptake of reporting guidelines) were considered simply a problem of knowledge  
37  
38 transfer (20) and it was thought that end users only needed to become aware of the knowledge  
39  
40 and they would then implement it. Understandings of the causes of know-do gaps continue to  
41  
42 evolve, and now these gaps are considered to be more of a knowledge production problem (the  
43  
44 knowledge being produced does not meet the needs of those who should be using it). Taking this  
45  
46 later perspective, addressing the know-do gap requires researchers to begin thinking of KT  
47  
48 before knowledge is created (21, 22). Proposed as an approach to address the issues of  
49  
50 knowledge production and application (21, 22), “integrated knowledge translation” (integrated  
51  
52  
53  
54  
55  
56  
57  
58  
59  
60

1  
2  
3 KT) is also identified as an approach that is more likely to lead to the practical application of  
4 knowledge (20, 23). The engagement of knowledge users in co-creating the research means the  
5 findings are more likely to be useful, useable and used (21, 22). As there are issues with the  
6 uptake of reporting guidelines (6) an integrated KT approach is appropriate for the development  
7 of reporting guidelines.  
8  
9  
10  
11  
12  
13

14  
15  
16  
17 Given the presumed benefits of an integrated KT approach and the desire to maximize the  
18 quality, usefulness and use of the reporting guideline, the team decided to adopt an integrated KT  
19 approach for the development of the CONSORT- Equity 2017 reporting guideline. In the case of  
20 CONSORT-Equity 2017, potential knowledge users of the reporting guideline were identified  
21 from a broad range of disciplines. These knowledge users are involved in research-related  
22 activities and disciplines such as clinical epidemiology, economics, social science, public health,  
23 international development, knowledge translation, patients or patient organizations (“patients”)  
24 and members of the public and so were invited to engage in the research to develop the reporting  
25 guideline.  
26  
27  
28  
29  
30  
31  
32  
33  
34  
35  
36  
37  
38  
39

40 The objective of this paper is to describe the use of an integrated KT approach in the  
41 development of the CONSORT-Equity 2017 reporting guideline and team members’ perceptions  
42 of the integrated KT process.  
43  
44  
45  
46  
47  
48

## 49 **METHODS**

50  
51 We adopted an observational study design involving participant observation supplemented with a  
52 survey of team members. We produced a description of team processes and experiences with the  
53  
54  
55  
56  
57  
58  
59  
60

1  
2  
3 structured integrated KT approach used to develop the CONSORT-Equity 2017 reporting  
4  
5 guideline (7). The research stages followed in developing the reporting guideline are described in  
6  
7 detail in a published protocol (7). Participant observation is a qualitative and interactive process  
8  
9 that connects to human experience through immersion and participation in a particular context  
10  
11 (24). The processes to develop CONSORT-Equity 2017 were structured by a framework that  
12  
13 depicts integrated KT, called the Collaborative Research Framework (“framework”) (25).  
14  
15

16  
17  
18  
19 The framework was selected as appropriate for use as engagement of knowledge users with  
20  
21 researchers throughout the development of CONSORT-Equity 2017 was a priority. The  
22  
23 framework was originally developed to describe the collaborative processes of work conducted  
24  
25 by researchers in full partnership with an Indigenous community to culturally adapt a shared  
26  
27 decision making tool through research processes of development, conduct and dissemination  
28  
29 (25). The framework consists of two stages that involve knowledge users and researchers  
30  
31 agreeing to establish the parameters of the study (forming an advisory body, agreements on the  
32  
33 approach to ethics, and theoretical assumptions in the research) and then the conduct of the study  
34  
35 with the knowledge users and researchers in full partnership throughout all the steps of a series  
36  
37 of studies. The framework describes structured processes of negotiation within the study  
38  
39 partnerships. It stresses the importance of engaging knowledge users as full partners with  
40  
41 researchers in a team (25). We describe the study processes of CONSORT-Equity 2017 in  
42  
43 relation to the framework that depicts integrated KT.  
44  
45  
46  
47  
48  
49  
50

51 We used the framework to guide development of CONSORT-Equity 2017 and to organize  
52  
53 documented observations and events that describe the development of CONSORT-Equity 2017  
54  
55  
56  
57  
58  
59  
60



1  
2  
3 (26). At the completion of the study, a survey was conducted with team members about their  
4 perceptions of the integrated KT approach.  
5  
6  
7  
8  
9

10 A survey was developed for team members to gather their feedback on the experience with the  
11 integrated KT approach. In consultation with an integrated KT expert (IDG), an eight-question  
12 on-line survey consisting of two Likert questions with an option for an open-ended comment,  
13 and six open-ended questions about experience with integrated KT during the CONSORT-Equity  
14 2017 study was developed and pilot-tested. Research ethics approval was obtained from the  
15 Bruyère Research Ethics Board (Bruyère REB Protocol # M16-15-042). The survey questions  
16 were designed to evoke understandings of the team experiences, with the two Likert questions  
17 about the extent to which team members felt they were engaged, and their satisfaction with  
18 engagement. The open-ended questions were aimed at soliciting details on the experience with  
19 integrated KT during the CONSORT-Equity 2017 study. The team members were asked to  
20 participate in a survey following the development of the CONSORT-Equity 2017 reporting  
21 guideline. There were 38 individuals invited to participate in the survey, with one declining to be  
22 invited to participate due to their personal time constraints.  
23  
24  
25  
26  
27  
28  
29  
30  
31  
32  
33  
34  
35  
36  
37  
38  
39  
40  
41

42 Following a process of informed consent, the survey was administered in July 2017 to the team  
43 members. The frequency of the responses to the two Likert questions was tabulated. To analyze  
44 participant responses to the six-open ended survey questions, a process of inductive content  
45 analysis was used, which involves segmenting responses by topics and into categories. For the  
46 analysis of these responses, each question was considered to be a topic and the responses and  
47  
48  
49  
50  
51  
52  
53  
54  
55  
56  
57  
58  
59  
60

1  
2  
3 development of codes defined the content in each category (27). One researcher conducted the  
4 content analysis process (JJ) and that was confirmed by a second reviewer (MY).  
5  
6  
7  
8  
9

### 10 **Patients and Public Involvement**

11  
12 Patients (that is, patients and members of the public) were members of the team involved in the  
13 design, conduct and reporting of the work to develop CONSORT-Equity 2017. As patients were  
14 members of the CONSORT-Equity 2017 team, patient priorities, experience, and preferences  
15 informed the development of research questions, design of the study, and the outcome measures  
16 that are reported in this document to describe the research processes of CONSORT-Equity 2017.  
17  
18 Patients are also identified as co-authors or acknowledged on the work presented here. The roles  
19 and membership of the team are reported in the study protocol and final product documents (7,  
20 17, 18, 28). For this reason, the work that is presented here is an example of how to conduct and  
21 report on the development of reporting guidelines in ways that include patients and which  
22 reflects their priorities, experiences and preferences (29).  
23  
24  
25  
26  
27  
28  
29  
30  
31  
32  
33  
34  
35  
36  
37

### 38 **RESULTS**

39  
40 The development of CONSORT-Equity 2017 used an integrated KT approach to structure  
41 replicable steps: to conduct research in a collaborative manner that uses consensus-building  
42 methods and involves co-creation of knowledge (25); and, to develop a reporting guideline for  
43 equity (CONSORT-Equity 2017). The process for co-creating the reporting guideline involved  
44 two stages: 1) establishing guiding features for co-creation, and 2) engaging knowledge users  
45 and researchers (the team) in research actions that supported the co-creation of the reporting  
46 guideline (Figure 1).  
47  
48  
49  
50  
51  
52  
53  
54  
55  
56  
57  
58  
59  
60

## Stage 1: Establishing Guiding Features for Co-creation

**Preparation: Finding common ground.** Initiating a process to engage researchers with potential knowledge users in the development of CONSORT-Equity 2017 involved discussions with individuals and meetings: 1) determining if and how knowledge users' interests and concerns align with those of researchers; 2) building relationships among knowledge users and researchers; 3) defining the parameters of a team relationship for knowledge users and researchers to find common ground and collaborate as a team on a project to develop CONSORT-Equity 2017 (25).

Finding common ground was an iterative three-step process that involved the preparation of a research team. The research team consisted of researchers and knowledge users who chose to work together to produce an agreed-upon research agenda.. Two researcher members (VW, PT) initially recognized the interest and need to extend a reporting guideline, CONSORT, for equity. Next, these researcher members identified potential research team members who shared concerns about equity in health systems, and so relationships were built and a rudimentary research team was formed. The members of the growing research team defined the objectives and parameters of a reporting guideline project in a proposal that was submitted for funding. Following the success of the funding proposal, the iterative, three-step process was then engaged in again by the research team to ensure inclusion of team members with a broad range of skills and expertise.

**An Advisory Board was formed.** Collaboration with knowledge users during the development of CONSORT-Equity 2017 was identified as an important feature of the study by the research team,

1  
2  
3 and a decision was made to form an advisory board consisting of the intended users of the  
4 reporting guideline. There was a deliberate effort to define roles and recruit nine members to the  
5 advisory board: journal editors, trialists, bioethicists, patients, clinicians, systematic review  
6 authors, policy makers, and funders. The advisory board is described in detail elsewhere (7). The  
7 need to ensure effective communication within and between the members of the advisory board  
8 and research team was identified, and two members of the research team were selected as  
9 facilitators: one with the advisory board (JJ) and the other with the research team (VW).  
10  
11  
12  
13  
14  
15  
16  
17  
18  
19  
20

21 The advisory board facilitator (JJ) worked with the advisory board members to define terms of  
22 reference and that included expectations (for example, meetings, types of contributions) and  
23 opportunities (for example, authorship guidelines) (Table 1). The facilitators (JJ, VW) worked to  
24 make plans and schedule events that created opportunities for the advisory board-research team(  
25 collectively referred to as “the team”) to function in a partnership to promote inclusion and  
26 respect for a multiplicity of views in the CONSORT-Equity 2017 study. Engagement between  
27 team members created opportunities to explore concepts related to health equity, and the results  
28 were reflected in products (for example, a tool to identify when a randomized trial is health-  
29 equity relevant (18)). Finally, the members of the team defined and agreed upon an agenda for  
30 the study which was published in a study protocol (7).  
31  
32  
33  
34  
35  
36  
37  
38  
39  
40  
41  
42  
43  
44  
45  
46

47 ***Commitment to Ethical Guidance.*** The members of the team agreed to collaborate and engage  
48 in decisions about how to structure the development of the reporting guideline so that there was  
49 adherence to ethical guidelines. The aim was to ensure respect for and representation of a broad  
50 range of views through agreements, structured communication and consensus-building processes  
51  
52  
53  
54  
55  
56  
57  
58  
59  
60

1  
2  
3 (18). The team agreed to adhere to Canadian ethical research guidelines during the conduct of the  
4  
5 CONSORT-Equity study(30).  
6  
7  
8  
9

10 ***Theoretical Perspective Clarified.*** The poor-quality or absence of evidence about health equity  
11  
12 is identified by policy makers as a key limitation of research (31). The team identified the lack of  
13  
14 consensus on the use of terminology related to health equity concepts and the importance of  
15  
16 underpinning assumptions as critical to the development of the reporting guideline.  
17

18  
19 Therefore, the members of the team sought to clarify terminology and relate these  
20  
21 understandings in publications to define the study parameters (7, 18). The team reflected on the  
22  
23 underpinning assumptions throughout the reporting guideline development process (for example,  
24  
25 a focus on social determinants of health theory, revisiting and reflecting on meanings of health  
26  
27 equity et cetera).  
28  
29  
30  
31  
32

### 33 **Stage 2: Research Actions that Supported the Co-creation of the Reporting Guideline**

34  
35 ***Reporting guideline development process.*** The agreed-upon guiding features of the research  
36  
37 approach (Stage 1) were used to structure the (Stage 2) multi-phase CONSORT-Equity 2017  
38  
39 study to accomplish objectives and create products over a two-year timeframe (Table 2). The use  
40  
41 of participatory methods in the form of facilitated on-line and in-person team meetings was used  
42  
43 to promote consensus building among team members, and that resulted in the co-creation of  
44  
45 knowledge in the form of a reporting guideline.  
46  
47  
48  
49  
50

51  
52 The team co-created the CONSORT-Equity 2017 following the methodology for consensus-  
53  
54 based reporting guideline development advanced by Moher et al. (16) and with the innovation of  
55  
56  
57  
58  
59  
60

1  
2  
3 key informant interviews (17). The five steps in reporting guideline development are: (i) define  
4 (establish guideline need within the team, (ii) assess (state of the literature, consultation with  
5 experts on health equity), (iii) develop/adapt (propose and debate adaptation of the reporting  
6 guideline), (iv) disseminate (develop and execute plan for uptake of the reporting guideline), and  
7 (v) apply (process of road-testing the reporting guideline).  
8  
9  
10  
11  
12  
13  
14  
15  
16

17 Table 1. Terms of Reference  
18  
19  
20  
21  
22  
23  
24  
25  
26  
27  
28  
29  
30

|                                          |                                                                                                                                                                                                                                                                                                                                      |
|------------------------------------------|--------------------------------------------------------------------------------------------------------------------------------------------------------------------------------------------------------------------------------------------------------------------------------------------------------------------------------------|
| 31 Role of advisory board membership     | -Members to participate in a collaborative process<br>-Members will provide content-related support, and bring knowledge, skills and experience to the working group throughout the multiple stages of the research study process (i.e., the integrated Knowledge Translation (KT) process including the end-of-grant dissemination) |
| 32 Method and frequency of communication | -The facilitator (JJ) will provide background documents<br>-Agendas to be provided in advance of meetings, with identification of key decisions to be made by the advisory board<br>-There will be ongoing opportunities for communication, in a manner that facilitates the function of advisory board members in their roles       |
| 33 Description of workload               | -Meeting participation by members<br>-Provision of feedback on key issues will be made in meetings or by email correspondence<br>-There will be opportunities for interested advisory board members to meet authorship criteria (see below “Authorship”)                                                                             |
| 34 Timelines                             | -The advisory board involvement is anticipated to begin in June 2015, and end in December 2016<br>-Meetings and/or updates will occur every 2 to 3 months (3 to 5 meetings/year, and with brief email correspondence)                                                                                                                |
| 35 How advice will be                    | -Advisory board input will be sought and considered along with                                                                                                                                                                                                                                                                       |

|                                                                                                                                                                                                                                                                                                                |            |                                                                                                                                                    |
|----------------------------------------------------------------------------------------------------------------------------------------------------------------------------------------------------------------------------------------------------------------------------------------------------------------|------------|----------------------------------------------------------------------------------------------------------------------------------------------------|
| 1<br>2<br>3<br>4<br>5<br>6<br>7<br>8<br>9                                                                                                                                                                                                                                                                      | managed    | that of the core research team.<br>-Disagreements on views will be respectfully and collaboratively managed by the advisory board facilitator (JJ) |
| 10<br>11<br>12<br>13<br>14<br>15<br>16<br>17<br>18<br>19<br>20<br>21<br>22<br>23<br>24<br>25<br>26<br>27<br>28<br>29<br>30<br>31<br>32<br>33<br>34<br>35<br>36<br>37<br>38<br>39<br>40<br>41<br>42<br>43<br>44<br>45<br>46<br>47<br>48<br>49<br>50<br>51<br>52<br>53<br>54<br>55<br>56<br>57<br>58<br>59<br>60 | Authorship | -Criteria outlined by International Journal Committee of Medical Journal Editors (IJCME) will be used to guide publication authorship (32).        |

For peer review only

1  
2  
3  
4  
5  
6  
7  
8  
9  
10  
11  
12  
13  
14  
15  
16  
17  
18  
19  
20  
21  
22  
23  
24  
25  
26  
27  
28  
29  
30  
31  
32  
33  
34  
35  
36  
37  
38  
39  
40  
41  
42  
43  
44  
45  
46  
47  
48  
49  
50  
51  
52  
53  
54  
55  
56  
57  
58  
59  
60

For peer review only



Table 2. Stages in the development of CONSORT-Equity 2017 update terms

| <b>Stage 1: Establish Guiding Features</b>                                                                                                        | <b>Example</b>                                                                                                                                                                                                                                                                                                                                                                                                                                                                                                         |
|---------------------------------------------------------------------------------------------------------------------------------------------------|------------------------------------------------------------------------------------------------------------------------------------------------------------------------------------------------------------------------------------------------------------------------------------------------------------------------------------------------------------------------------------------------------------------------------------------------------------------------------------------------------------------------|
| 1) Find Common Ground                                                                                                                             | A process to initiate and develop a collaborative work plan that for CONSORT-Equity 2017 was an iterative 3-step process to prepare a research team.                                                                                                                                                                                                                                                                                                                                                                   |
| 2) Form an advisory board                                                                                                                         | Defined advisory board roles, accessed networks to recruit advisory board members; terms of reference to structure relationships within and between the advisory board-research team members (“the team”) (Table 1). Set an agreed-upon agenda that eventually resulted in a published protocol (7).<br>Consensus building processes promoted engagement in active debate and co-creation of knowledge that resulted in, for example, defining and validating when a randomized trial is health- equity relevant (18). |
| 3) Commit to ethical guidance                                                                                                                     | The team agreed on study conduct to adhere to ethical guidelines (in Canada, the Tri-Council Policy Statement Version 2) (33) and that could include other research ethics protocols or requirements considered relevant by team members, such as the example of research conduct with Indigenous Peoples (34, 35).                                                                                                                                                                                                    |
| 4) Clarify theoretical perspective                                                                                                                | CONSORT-Equity 2017 is premised on understandings of key concepts, their definitions and usage by the team: understandings of health equity and agreements among team members about underpinning assumptions: the role of social determinants of health theory, a definition of “health equity”, defining a health-equity relevant randomized trial and when there is a health disadvantage, and that are reflected in publications (7, 18).                                                                           |
| <b>Stage 2: Research actions that supported the co-creation of the reporting guideline.</b><br><br>Reporting guideline development process steps. | <b>Example:</b> The five reporting guideline development steps of Stage 2 are bound by the guiding features of Stage 1.                                                                                                                                                                                                                                                                                                                                                                                                |
| 1) Define                                                                                                                                         | Establish guideline need with the team: team members were engaged in a process to determine whether and how they might collaborate to develop an extension of CONSORT for equity. Following funding, further work among the team members resulted in a published protocol (7) and a tool that determines when a randomized trial is health-equity relevant (18) and so should use a reporting guideline for health equity.                                                                                             |

|                  |                                                                                                                                                                                                                                                                                                                                                                                                                                                                                                                                |
|------------------|--------------------------------------------------------------------------------------------------------------------------------------------------------------------------------------------------------------------------------------------------------------------------------------------------------------------------------------------------------------------------------------------------------------------------------------------------------------------------------------------------------------------------------|
|                  |                                                                                                                                                                                                                                                                                                                                                                                                                                                                                                                                |
| 2) Assess        | Determine the state of the literature (7, 28, 36): Consultation with experts on health equity and that included the use of key informant interviews with interdisciplinary knowledge users(17).                                                                                                                                                                                                                                                                                                                                |
| 3) Develop/Adapt | Propose and debate adaptation of the reporting guideline: Identification of potential guideline knowledge users from high, middle and lower income countries that include, for example, patients and methodologists; and who were invited to participate in an online Delphi study to identify items for the reporting guideline (28). Then, a consensus meeting (the 2016 Boston Equity Symposium that included guideline knowledge users) was held to discuss and debate evidence for inclusion in CONSORT-Equity 2017 (28). |
| 4) Disseminate   | Develop and execute plan for uptake of the reporting guideline Outcomes are reflected in the success of an invitational study meeting (the 2016 Boston Equity Symposium) and co-authored publications (17, 18, 28, 36, 37) and the CONSORT-Equity 2017 checklist elaboration and explanation (28, 38).                                                                                                                                                                                                                         |
| 5) Apply         | A process of road-testing the reporting guideline: Work is underway to further disseminate and promote the application of the CONSORT-Equity 2017 guideline.                                                                                                                                                                                                                                                                                                                                                                   |

### Extent of knowledge user engagement

The use of the integrated KT approach facilitated engagement within the team by creating structures and opportunities for all team members to offer their views for the development of CONSORT-Equity (17, 28). We failed to engage with one advisory board member due to time constraints around their ability to participate; and it was not possible for every member of the team to have their views accommodated and some members chose to remove themselves from participation either temporarily or permanently (n=2). As well, it was not possible (and indicated as not desirable by members of the team) for every team member to participate in every step of the guideline development process, although opportunities to participate were actively welcomed

1  
2  
3 and sought by the facilitators. For the development of the CONSORT-Equity 2017 reporting  
4 guideline there are publications (see Table 2) that document descriptions of the particular study  
5 processes, and that include identification of who and how the team members were involved  
6  
7  
8  
9  
10 (7,18,28,36,37).  
11  
12  
13

14  
15 As collaboration and consensus-building methods were a central feature in CONSORT-Equity  
16 2017 development, it was important to understand the experiences of those who were involved in  
17 the reporting guideline development. An eight-question on-line survey consisting of two Likert  
18 questions with an option for an open-ended comment, and six open-ended questions about the  
19 experience with an integrated KT approach during the CONSORT-Equity 2017 study was  
20 administered to team members. Twenty-four of the 37 team members responded to the first two  
21 Likert questions on the survey (response rate of 65%). When asked “Overall, how would you  
22 rate the extent to which the research team engaged you in the study? (Where 1 is not at all  
23 satisfied and 5 is totally satisfied)” 18/24 (75%) of surveyed respondents indicated “very or  
24 totally satisfied”. An illustrative quote was: “I had a concrete role in the process and the team  
25 was very respectful and considerate of input so it was easy to feel invested”. In response to the  
26 second Likert question “How satisfied are you with the level of your engagement with the  
27 research team? (Where 1 is not at all satisfied and 5 is totally satisfied)”, 21/24 (87.5%) of the  
28 respondents indicated “very or totally satisfied”. An illustrative quote from this response was: “[I  
29 would] be happy (very) if all research teams engaged all participants in the same manner”.  
30  
31  
32  
33  
34  
35  
36  
37  
38  
39  
40  
41  
42  
43  
44  
45  
46  
47  
48

49 Table 3. Results of two Likert questions on a team survey about experience with integrated  
50 knowledge translation (KT) approach (n=24).  
51  
52  
53  
54  
55  
56  
57  
58  
59  
60

Table 3. Results of two Likert questions on a team survey about experience with integrated knowledge translation (KT) approach (n=24)

| Question                                                                                             | Response category                               |                                               |                                         |                                              |                                                  | Illustrative quote from open-ended comments                                                                                       |
|------------------------------------------------------------------------------------------------------|-------------------------------------------------|-----------------------------------------------|-----------------------------------------|----------------------------------------------|--------------------------------------------------|-----------------------------------------------------------------------------------------------------------------------------------|
| Overall, how would you rate the extent to which the research team engaged you in the project. (n=24) | 1<br>(not at all satisfied):<br><br>n=0<br>(0%) | 2<br>(somewhat satisfied):<br><br>n=2<br>(8%) | 3<br>(satisfied):<br><br>n=4<br>(16.6%) | 4<br>(very satisfied):<br><br>n=3<br>(12.5%) | 5<br>(totally satisfied):<br><br>n=15<br>(62.5%) | “I had a concrete role in the process and the team was very respectful and considerate of input so it was easy to feel invested”. |
| How satisfied are you with the level of your engagement with the research team. (n=24)               | 1<br>(not at all satisfied):<br><br>n=1<br>(4%) | 2<br>(somewhat satisfied):<br><br>n=0<br>(0%) | 3<br>(satisfied):<br><br>n=2<br>(8%)    | 4<br>(very satisfied):<br><br>n=3<br>(12.5%) | 5<br>(totally satisfied):<br><br>n=18<br>(75%)   | “[I would] be happy (very) if all research teams engaged all participants in the same manner”.                                    |

1  
2  
3 In the portion of the survey that included six open-ended questions, respondents were asked to  
4 provide details about their experience with the integrated KT approach during the development  
5 of the CONSORT-Equity 2017 reporting guideline. Frequency counts of the type of responses  
6 were recorded and are reported in Table 4 with illustrative quotes.  
7  
8  
9  
10  
11  
12  
13

14  
15 When participants were asked what they perceived as the benefits of an integrated KT approach  
16 (question 1), the most common (14/25; 56%) response described integrated KT as an approach  
17 that allows multiple voices/opinions to be heard and considered. In response to being asked  
18 about whether they thought that the team faced any challenges in the study as the result of the  
19 integrated KT approach (question 2), many participants (8/25; 32%) reported that the logistics  
20 involved with including lots of people was a challenge, but a slightly larger number (9/25; 36%)  
21 reported that they were unaware of any team challenges. When asked about whether they faced  
22 any challenges during the development of the reporting guideline as the result of the integrated  
23 KT approach (question 3), the vast majority of participants (19/25; 76%) indicated that they did  
24 not face any challenges.  
25  
26  
27  
28  
29  
30  
31  
32  
33  
34  
35  
36  
37  
38  
39

40 Participants were asked what they considered to be the impact(s) of using an integrated KT  
41 approach with reporting guideline development (question 4), and many (11/25; 44%) indicated  
42 that an integrated KT approach improved the relevance of the final guideline product, and  
43 (11/25; 44%) reported that the work to develop CONSORT-Equity 2017 was better informed.  
44  
45  
46  
47  
48  
49 When asked if they would change anything about how the integrated KT approach was used  
50 (question 5), few participants provided a response (n=15) and of those that did indicate a  
51 response, most participants (8/15; 53%) indicated that they would not have changed anything.  
52  
53  
54  
55  
56  
57  
58  
59  
60

1  
2  
3 Finally, when asked for additional comments (question 6), while most respondents (19/25; 76%)  
4 provided no comments, some (6/25; 24%) reported that the integrated KT process was a positive  
5 experience (Table 4).  
6  
7  
8  
9

10  
11  
12 During the development of CONSORT-Equity 2017, team members were found to be more  
13 engaged in particular activities in relation to their knowledge, occupational roles, and in relation  
14 to life events. For example, some team members were found to play a larger role when the team  
15 activities required expertise held by team members (for example, expertise about health equity,  
16 the conduct of randomized trials et cetera). The development of the CONSORT-Equity 2017  
17 reporting guideline was voluntary for most team members – and was unpaid work – and so other  
18 employment or volunteer commitments may have influenced the ability of team members to  
19 participate in meetings. As well, personal factors (for example, health issues, family events,  
20 travel plans) had impacts on participation of team members in the development of CONSORT-  
21 Equity 2017.  
22  
23  
24  
25  
26  
27  
28  
29  
30  
31  
32  
33  
34  
35  
36  
37

38 Table 4. Results of six open-ended questions on a team survey about experience with an  
39 integrated knowledge translation (KT) approach (n=25).  
40  
41  
42  
43

| Question                                                                                                                                                       | Response                                                                                                                                                                                                                                                                                                                                                                                                                                                                                        |
|----------------------------------------------------------------------------------------------------------------------------------------------------------------|-------------------------------------------------------------------------------------------------------------------------------------------------------------------------------------------------------------------------------------------------------------------------------------------------------------------------------------------------------------------------------------------------------------------------------------------------------------------------------------------------|
| 1. What do you perceive as the benefits of an integrated knowledge translation (KT) approach to develop a reporting guideline extension of CONSORT for equity? | 1) Allows consideration and inclusion of a range of views (14/25; 56%): “Capturing a multitude of perspectives, to enhance relevance and acceptability of reporting guidelines across disciplines”.<br>2) Fosters engagement in study processes (6/25; 24%): “It allows participation and engagement of various stakeholders at all stages of the project for whom the guideline is relevant”.<br>3) Enhance guideline uptake (5/25; 20%): “Results are more likely to be adopted and applied”. |

|                                                                                                                            |                                                                                                                                                                                                                                                                                                                                                                                                                                                                                                                                                                       |
|----------------------------------------------------------------------------------------------------------------------------|-----------------------------------------------------------------------------------------------------------------------------------------------------------------------------------------------------------------------------------------------------------------------------------------------------------------------------------------------------------------------------------------------------------------------------------------------------------------------------------------------------------------------------------------------------------------------|
| <p>2. Do you think that <u>the team</u> faced any challenges in the study as the result of the integrated KT approach?</p> | <p>1) The logistics of including a range of people in the team (8/25; 32%): “Takes more time to work with a large and diverse crowd”.</p> <p>2) Management of views (5/25; 20%): “Because of the wide range of different disciplines present, it may have been difficult to engage all participants equally across all issues”.</p> <p>3) Reconciliation of within-team differences (3/25; 12%): “It is difficult to deal with perhaps conflicting and at times unclear opinions”.</p> <p>4) Unaware of any team challenges (9/25; 36%): “Not that I'm aware of”.</p> |
| <p>3. Did <u>you</u> face any challenges in the study as the result of the integrated KT approach?</p>                     | <p>1) No personal challenges faced in the study (19/25; 76%): “I did not face any challenges. My input and participation had equal standing in the process”.</p> <p>2) The personal experience of challenge related to the pace, number of consultations, and/or to provide informed opinions (6/25; 24%): “It was slow at times and a bit frustrating. We achieved what we did through patience, persistence and good will of team members”.</p>                                                                                                                     |
| <p>4. What do you consider to be the impact(s) of using an integrated KT approach with the study?</p>                      | <p>1) Improves the final guideline product (11/25; 44%): “I feel that we produced a product that was relevant to all of our team members, and that they can support in their communities”.</p> <p>2) Inclusion of different forms of knowledge (11/25; 44%): “It ensures that the study is better informed by the expertise, perspectives and needs of the different stakeholders”.</p> <p>3) Unsure/did not notice impact of integrated KT approach (3/25; 12%): “Not sure”.</p>                                                                                     |
| <p>5. Would you have changed anything about how the integrated KT approach was used in the study? If yes, how?</p>         | <p>1) Would not change the use of the integrated KT approach (8/15; 53%): “No change suggested”.</p> <p>2) Greater range of participants (3/15; 20%): “I would have tried to broaden the scope of stakeholders”.</p> <p>3) Narrow the stakeholder focus and seek more intense consultations, such as through in-person meetings (2/15; 13%): “Smaller reach, deeper consultation”.</p> <p>4) More time (2/15; 13%): “More time is always a benefit to measure the impact”.</p>                                                                                        |
| <p>6. Do you have any additional comments?</p>                                                                             | <p>1) No comment (19/25; 76%).</p> <p>2) Indicated that it was a positive experience (6/25; 24%): “I would do this again”.</p>                                                                                                                                                                                                                                                                                                                                                                                                                                        |

## DISCUSSION

A team engaged in mutually-agreed upon processes to co-create knowledge and assemble empirical evidence to develop a reporting guideline, CONSORT-Equity 2017. The team was established to function as a partnership throughout the study process to promote inclusion and respect for a range of views. A structured integrated KT approach was used to organize ongoing negotiations among team members and used replicable steps to develop a reporting guideline. The aim was to ensure that the team's agreed upon goals were achieved: to conduct research in a collaborative manner that uses consensus-building methods and involves co-creation of knowledge; and, to develop a reporting guideline for equity (CONSORT-Equity 2017) as a contribution to address health systems' equity issues.

### **Perceptions of the integrated KT approach and impacts on co-creation of knowledge**

Our study involved a 38-member interdisciplinary team from eight countries that included patients, and who collaborated in the development of CONSORT-Equity 2017. Details on the team members and processes are reported in detail elsewhere (7, 28). There is little evidence in the literature about the experiences of interdisciplinary teams that include journal editors, trialists, bioethicists, patients, clinicians, systematic review authors, policy makers, and funders. Previous studies that investigate patient perspectives on clinical guideline development concluded that effective engagement in the development process requires planning, and the recommendations arising from that work include: the use of smaller and diverse groups, with no prior relationships with other members of the team; individual and group preparation for engagement on the team; and, an identified contact person for participants (39). In our study, we



1  
2  
3 prepared an interdisciplinary and international team to work together in the development of a  
4 reporting guideline.  
5  
6  
7  
8  
9

10 Many options exist to facilitate collaboration within research partnerships and that foster  
11 democratic approaches to knowledge creation (23, 40-42). An integrated KT approach was  
12 identified as appropriate for our team and its' proposed development of a reporting guideline, as  
13 it focuses on the co-creation of knowledge with practical applications (23). Furthermore, we  
14 found that during the development of the reporting guideline, an integrated KT approach  
15 supported many opportunities for team members to be fully involved in the entire research  
16 process as planned during the CONSORT-Equity 2017 protocol development (7). The integrated  
17 KT approach began with an iterative process of preparation of team members for participation in  
18 a research partnership, a feature reported in other frameworks that structure engagement of  
19 knowledge users with researchers in health research (41, 43, 44). The members of the team  
20 involved in the development of CONSORT-Equity 2017 were invited to participate in all phases  
21 of the reporting guideline development process, and efforts were made by facilitators to  
22 accommodate their participation.  
23  
24  
25  
26  
27  
28  
29  
30  
31  
32  
33  
34  
35  
36  
37  
38  
39  
40  
41

42 The value of knowledge user engagement during the reporting guideline development is asserted  
43 in a sub-study that was conducted with interdisciplinary key informants. This study, which  
44 engaged key informants in interviews about their views and suggestions for an extension of  
45 CONSORT for equity, was found to generate new concepts that contributed to the development  
46 of CONSORT-Equity 2017 (17). We prioritized the engagement of team members throughout  
47 the development of CONSORT-Equity 2017 to improve the likelihood that CONSORT-Equity  
48  
49  
50  
51  
52  
53  
54  
55  
56  
57  
58  
59  
60

1  
2  
3 2017 would be perceived as useful and applicable in practice. To strive for authentic (that is,  
4 ethical, equitable) engagement, deliberate efforts were made to foster relationships within a team  
5 that consisted of knowledge users and researchers.  
6  
7  
8  
9

10  
11  
12 The successful engagement of team members was possibly due to the structured integrated KT  
13 approach that fostered processes of negotiation and created opportunities for team members to  
14 choose their level of engagement. For example, there were ongoing opportunities for members of  
15 the team to engage at different stages of the CONSORT-Equity 2017 study. These opportunities  
16 were initially identified during the preparation for the development of CONSORT-Equity 2017.  
17  
18 The iterative and prolonged focus on preparation of team members led to the development of a  
19 shared agenda for the work to develop CONSORT-Equity 2017. The finding of a focus on  
20 iterative preparation of team members is an innovation on the original framework used to guide  
21 the integrated KT approach (Figure 1). The opportunity to prepare team members to engage in  
22 the CONSORT-Equity 2017 study and to work together led to opportunities to develop and make  
23 shared understandings and agreements explicit. The team facilitators built on the success of the  
24 initial engagement of team members in the reporting guideline development, and created  
25 frequent and varied opportunities for ongoing participation in the CONSORT-Equity 2017 study  
26 processes (for example, through scheduled face-to-face and/or telephone calls, maintained  
27 regular email study updates).  
28  
29  
30  
31  
32  
33  
34  
35  
36  
37  
38  
39  
40  
41  
42  
43  
44  
45  
46  
47  
48

49 The experience with varied levels of engagement by team members in the CONSORT-Equity  
50 2017 study led to consideration of the meaning of “engagement” among an interdisciplinary  
51 team consisting of knowledge users and researchers. Overall, our team consisted of a committed  
52  
53  
54  
55  
56  
57  
58  
59  
60

1  
2  
3 group of team members who were involved in a collaborative effort for the duration of the work  
4  
5 to develop CONSORT-Equity 2017. Team members met and agreed upon objectives and this in  
6  
7 turn resulted in co-created products. During the series of studies to CONSORT-Equity 2017  
8  
9 studies the nature and degree of engagement varied over time and according to the capacity of  
10  
11 team members and study tasks. Team members asked to: be kept informed but did not want to  
12  
13 actively participate (for example, one-way direction of information updates on the study such as  
14  
15 an email with announcements); be consulted for feedback (for example, responding to an email  
16  
17 request for information or feedback on a document); play a supportive role for others who  
18  
19 provide governance in the CONSORT-Equity 2017 study processes (for example, providing  
20  
21 support in a study in response to requests by team leads); share in the governance of the study  
22  
23 (for example, advising and/or decision making in a co-leading role, such as in development of  
24  
25 CONSORT-Equity 2017 study directions or products. The different levels at which knowledge  
26  
27 user engagement may occur has been under examination for many years and one of the earliest  
28  
29 instances is Arnstein's 1969 ladder of participation and that ranges from non-participation to  
30  
31 citizen control (45). Since then there have been many other ways of conceptualizing knowledge  
32  
33 user engagement in research (46-48).  
34  
35  
36  
37  
38  
39  
40  
41

42 During our CONSORT-Equity 2017 study, we accomplished the engagement of team members  
43  
44 that included knowledge users in study governance – and then exceeded this aim with knowledge  
45  
46 user leadership. There are documented instances of varied team members taking the lead during  
47  
48 the CONSORT-Equity 2017 study conduct and that occurred during meetings (for example,  
49  
50 expert knowledge user leads taking initiative with and guiding sessions at the Boston Equity  
51  
52 Symposium) and with study publications (37). The range of engagement that was observed  
53  
54  
55  
56  
57  
58  
59  
60

1  
2  
3 during the CONSORT-Equity 2017 study processes demonstrate that engagement may be more  
4 changeable, nuanced, and less able to be anticipated than is currently described in the literature  
5 encouraging knowledge user engagement (12, 47). The use of the structured integrated KT  
6 approach allowed members of the team to determine how and in what capacity they would  
7 contribute, while also being engaged to co-create a reporting guideline.  
8  
9  
10  
11  
12  
13  
14  
15  
16

### 17 **Limitations and strengths for use of an integrated KT approach to develop a reporting** 18 **guideline** 19

20  
21 The surveyed team members identified the main limitations (challenges) of an integrated KT  
22 approach to be the logistics of including a range of interdisciplinary team members in the study,  
23 and the management of team views. The team facilitators reflected on the logistics and the  
24 challenges of scheduling meetings to accommodate or align with team member commitments  
25 (outside of CONSORT-Equity 2017) and time constraints for those on the team to participate in  
26 the study. As well, there may have been impacts on the participation of team members due to the  
27 reliance upon the facilitators who were based at one site and responsible for fostering regular and  
28 productive contacts, and with the use of online communications (versus face-to-face meetings).  
29 For example, communication between and within those on the team was a challenge due to the  
30 logistics of time zones, the numbers of people, limitations of technology. These challenges were  
31 further complicated by the need to bring team member views together in consensus to achieve  
32 CONSORT-Equity 2017 study objectives.  
33  
34  
35  
36  
37  
38  
39  
40  
41  
42  
43  
44  
45  
46  
47  
48  
49  
50

51 The surveyed team members identified the main strength of the integrated KT approach to be the  
52 consideration and inclusion of a range of views in the research process. The facilitators of the  
53  
54  
55  
56  
57  
58  
59  
60

1  
2  
3 team reflected on the use of study processes structured by the integrated KT approach that, for  
4  
5 the duration of the study, made it possible to build and/or strengthen research relationships  
6  
7 initiated at the start of the study and across a range of team members. These research  
8  
9 relationships were demonstrated by team member participation in publication co-authorship,  
10  
11 attendance at regular meetings, email contacts, and feedback on products.  
12  
13  
14  
15  
16

### 17 **Limitations and strengths of the study to evaluate an integrated KT approach**

18  
19 The limitations of the study about the use of an integrated KT approach reported in this paper  
20  
21 include that the work to evaluate the use of an integrated KT approach (the observational study)  
22  
23 was done with a smaller group of interdisciplinary team members, and that team members  
24  
25 already shared an interest in the taking an integrated KT approach in the development of a  
26  
27 reporting guideline (CONSORT-Equity 2017). For this reason, the findings about the integrated  
28  
29 KT process presented here may not be relevant to other teams that consist of a different groups  
30  
31 of team members, and that have different team objectives. In addition, the methods we used are  
32  
33 observational and not established for use with teams who are engaged in a multiple series of  
34  
35 studies to develop an end-product (in our instance, a reporting guideline). The strengths are that  
36  
37 we used a previously developed framework (25) to structure our reporting about the use of an  
38  
39 integrated KT approach. As well, we successfully engaged an interdisciplinary team throughout  
40  
41 the guideline development process and were able to evaluate the process.  
42  
43  
44  
45  
46  
47  
48

### 49 **CONCLUSIONS**

50  
51 A structured integrated KT approach was successfully used to engage an interdisciplinary and  
52  
53 international team to develop a reporting guideline, CONSORT-Equity 2017. The use of an  
54  
55  
56  
57  
58  
59  
60

1  
2  
3 integrated KT approach fostered engagement of the team in the study processes and prompted  
4  
5 deliberation and consensus building among team members. Further work is needed to examine  
6  
7 and better understand the use and potential applications of an integrated KT approach to other  
8  
9 initiatives seeking to improve research reporting guidelines.  
10  
11  
12  
13

14 [Figure 1. Integrated Knowledge Translation (KT) approach for CONSORT-Equity 2017]  
15  
16  
17  
18

19 **Ethics Approval:** Participants gave informed consent before taking part in the study of the  
20  
21 integrated KT approach used in the development of the CONSORT-Equity 2017 reporting  
22  
23 guideline reported in this manuscript (Bryère REB Protocol # M16-15-042).  
24  
25  
26  
27

28 **Transparency Statement:** The lead author and guarantor (JJ) affirms that the manuscript is an  
29  
30 honest, accurate, and transparent account of the study being reported; that no important aspects  
31  
32 of the study have been omitted. There were no deviations from what was planned.  
33  
34  
35  
36  
37

38 **Role of funding source:** Funding was not received for this study.  
39  
40  
41  
42

43 **Data sharing statement:** No additional data available.  
44  
45  
46

47 **Competing interests:** All authors have completed the Unified Competing Interest form  
48  
49 (available on request from the corresponding author) and declare: no support from any  
50  
51 organization for the submitted work; no financial relationships with any organizations that might  
52  
53 have an interest in the previous three years; no other relationships or activities that could appear  
54  
55  
56  
57  
58  
59  
60

1  
2  
3 to have influenced the submitted work, with the following exceptions: 1) Dr. Cuervo reports he  
4 works as a Senior Advisor for Health Systems Research to the Pan American Health  
5 Organization/World Health Organization. His Organization's Policy on Research for Health calls  
6 for the development and use of research reporting standards and improving the value and impact  
7 of research for health. His opinions and contributions to this manuscript are his own and do not  
8 necessarily reflect the decisions or policies of his employer; 2) Dr. Moher reports that he is one  
9 of the 'inventors' of CONSORT; 3) Dr. Welch reports grants from Canadian Institutes of Health  
10 Research, grants from Ontario Early Career Researcher Award, during the conduct of the study.  
11  
12  
13  
14  
15  
16  
17  
18  
19  
20  
21  
22  
23

**Contributorship Statement:** JJ, IDG, VW conceived and led the design of the work described  
24 in the manuscript and were responsible for the first and final drafts of this manuscript. EK,  
25 DM,JP, MY, PT, VW and members of the CONSORT-Equity 2017 and Boston Equity  
26 Symposium coauthors participated in and provided substantial contributions to the analysis and  
27 interpretation during development of the work described in the manuscript. JJ led writing of the  
28 first version of the manuscript. JJ and IDG revised the manuscript. EK, DM,JP, MY, PT, VW  
29 made contributions to drafts of this manuscript including the listed members of the CONSORT-  
30 Equity 2017 and Boston Equity Symposium, and have reviewed and revised the manuscript for  
31 important intellectual content and approved the final version of the manuscript.  
32  
33  
34  
35  
36  
37  
38  
39  
40  
41  
42  
43  
44  
45  
46

47 Dr. Janet Jull is the guarantor of the article.  
48  
49  
50  
51  
52

### 53 **Acknowledgements**

54 Collaborating authors who are identified as a member of the CONSORT-Equity and Boston  
55 Equity Symposium participants are as follows: Rebecca Armstrong, Sarah Baird, Yvonne Boyer,  
56  
57  
58  
59  
60

Luis Gabriel Cuervo, Regina Greer-Smith, Anne Lyddiatt, Jessie McGowan, Lawrence Mbuagbaw, Tomas Pantoja, Beverly Shea, Bjarne Robberstad, Howard White, George Wells. Reporting of involvement of patients and public is included here.

We thank the following individuals for their support and encouragement: Mark Petticrew, Jeremy Grimshaw, Charles Weijer, Monica Taljaard, Yukiko Asada.

JJ held a Canadian Institutes of Health Research (CIHR) Postdoctoral Fellowship for a portion of the time she was writing the paper.

IDG is a recipient of a CIHR foundation grant (FDN# 143237).

### References- to be finalized

1. World Health Organization (WHO) Assembly. WHO Strategy on Research for Health; WHO Roles and responsibilities on health research: document WHA63.22 and Resolution. 20 Avenue Appia, 1211 Geneva 27, Switzerland; 2012.
2. Pan American Health Organization, DC, 61st Session of the Regional Committee of WHO for the Americas. Policy on research for health: document CD49/10. Washington, DC: PAHO; 2009.
3. Glasziou P, Altman DG, Bossuyt P, Boutron I, Clarke M, Julious S, et al. Reducing waste from incomplete or unusable reports of biomedical research. *Lancet*. 2014;383(9913):267-76.
4. EQUATOR Network. The EQUATOR Network: Enhancing the Quality and Transparency of Health Research Centre for Statistics in Medicine (CSM), NDORMS, University of Oxford.: UK EQUATOR Centre; n.d. [Available from: <https://www.equator-network.org/>].
5. Centre for Journalology. Using Reporting Guidelines Ottawa Hospital Research Institute 2019 [Available from: <http://www.ohri.ca/journalology/docs/guidelines.aspx>].
6. Turner L, Shamseer L, Altman DG, Schulz KF, Moher D. Does use of the CONSORT Statement impact the completeness of reporting of randomised controlled trials published in medical journals? A Cochrane review. *Syst Rev*. 2012;1:60.
7. Welch V, Jull J, Petkovic J, Armstrong R, Boyer Y, Cuervo LG, et al. Protocol for the development of a CONSORT-equity guideline to improve reporting of health equity in randomized trials. *Implement Sci*. 2015;10:146.
8. Whitehead M. The concepts and principles of equity and health. *Int J Health Serv*. 1992;22(3):429-45.
9. Sackett D, Rosenberg W, Gray JA, Haynes RB, Richardson WS. Evidence based medicine: what it is and what it isn't. *BMJ*. 1996;312:71-2.
10. Marmot M, Allen J, Bell R, Goldblatt P. Building of the global movement for health equity: from Santiago to Rio and beyond. *Lancet*. 2012;379(9811):181-8.



11. Lorenc T, Petticrew M, Welch V, Tugwell P. What types of interventions generate inequalities? Evidence from systematic reviews. *J Epidemiol Community Health*. 2013;67(2):190-3.
12. Canadian Institutes of Health Research (CIHR). Patient Engagement: What is patient engagement? Government of Canada 2018 [Available from: <http://www.cihr-irsc.gc.ca/e/45851.html>].
13. Jarrett L, Patient Involvement Unit (PIU) PIU. Patient Involvement Unit (PIU). A report on a study to evaluate patient/ carer membership of the first NICE Guideline Development Groups. London: National Institute for Clinical Excellence (NICE); 2004.
14. Qaseem A, Forland F, Macbeth F, Ollenschläger G, Phillips S, van der Wees P, et al. Guidelines International Network: toward international standards for clinical practice guidelines. *Ann Intern Med*. 2012;156(7):525-31.
15. Armstrong MJ, Bloom JA. Patient involvement in guidelines is poor five years after institute of medicine standards: review of guideline methodologies. *Res Involv Engagem*. 2017;3:19.
16. Moher D, Schulz KF, Simera I, Altman DG. Guidance for developers of health research reporting guidelines. *PLoS Med*. 2010;7(2):e1000217.
17. Jull J, Petticrew M, Kristjansson E, Yoganathan M, Petkovic J, Tugwell P, et al. Engaging knowledge users in development of the CONSORT-Equity 2017 reporting guideline: a qualitative study using in-depth interviews. *Res Involv Engagem*. 2018;4:34.
18. Jull J, Whitehead M, Petticrew M, Kristjansson E, Gough D, Petkovic J, et al. When is a randomised controlled trial health equity relevant? Development and validation of a conceptual framework. *BMJ Open*. 2017;7(9):e015815.
19. Graham ID, Logan J, Harrison MB, Straus SE, Tetroe J, Caswell W, et al. Lost in knowledge translation: time for a map? *J Contin Educ Health Prof*. 2006;26(1):13-24.
20. Canadian Institutes of Health Research (CIHR). Guide to knowledge translation planning at CIHR: integrated and end-of-grant approaches 2015 [Available from: <http://www.cihr-irsc.gc.ca/e/45321.html>].
21. Van de Ven D, Johnson P. Knowledge for theory and practice. *Academy of Management Review*. 2006;31(4):802-21.
22. Bowen S, Graham I. Integrated Knowledge Translation. In: SE Straus, J Tetroe, ID Graham, editors. Knowledge Translation in Healthcare: moving evidence to practice. West Sussex: Wiley; 2013. p. 14-23.
23. Jull J, Giles A, Graham ID. Community-based participatory research and integrated knowledge translation: advancing the co-creation of knowledge. *Implement Sci*. 2017;12(1):150.
24. Guest G NE, Mitchell ML. Collecting Qualitative Data: A Field Manual for Applied Research. 2013 2019/02/16. 55 City Road, London: SAGE Publications, Ltd; [75-112]. Available from: <http://methods.sagepub.com/book/collecting-qualitative-data>.
25. Jull J, Giles A, Boyer Y, Stacey D, Minwaashin Lodge. Development of a Collaborative Research Framework: The Exampe of a Study Conducted by and with a First Nations, Inuit and Metis Women's Community and Their Research Partners.. *ACME: An International Journal for Critical Geographies*. 2018; 17(3), 671-86..
26. Jull J, CONSORT-Equity Team. The value of an integrated knowledge translation approach for developing reporting guidelines: engaging knowledge users interested in equity-relevant decision making. Knowledge Translation Canada Scientific Meeting Toronto, Ontario, Toronto, Ontario2016.

27. Morse J, Field P. Nursing research : the application of qualitative approaches. London: Chapman & Hall; 1996.
28. Welch VA, Norheim OF, Jull J, Cookson R, Sommerfelt H, Tugwell P, et al. CONSORT-Equity 2017 extension and elaboration for better reporting of health equity in randomised trials. *BMJ*. 2017;359:j5085.
29. Staniszewska S, Brett J, Simera I, Seers K, Mockford C, Goodlad S, et al. GRIPP2 reporting checklists: tools to improve reporting of patient and public involvement in research. *Res Involv Engagem*. 2017;3:13.
30. Canadian Institutes of Health Research, Natural Sciences and Engineering Research Council of Canada, and Social Sciences and Humanities Research Council of Canada. *Tri-Council Policy Statement: Ethical Conduct for Research Involving Humans* 2018 [Available from: [http://www.pre.ethics.gc.ca/pdf/eng/tcps2/TCPS\\_2\\_FINAL\\_Web.pdf](http://www.pre.ethics.gc.ca/pdf/eng/tcps2/TCPS_2_FINAL_Web.pdf)].
31. Petticrew M, Whitehead M, Macintyre SJ, Graham H, Egan M. Evidence for public health policy on inequalities: 1: the reality according to policymakers. *J Epidemiol Community Health*. 2004;58(10):811-6.
32. International Committee of Medical Journal Editors (ICJME). Defining the role of authors and contributors 2018 [Available from: <http://www.icmje.org/recommendations/browse/roles-and-responsibilities/defining-the-role-of-authors-and-contributors.html>].
33. Panel on Research Ethics. TCPS 2 – Chapter 9. Research Involving the First Nations, Inuit and Métis Peoples of Canada [Available from: <http://www.pre.ethics.gc.ca/eng/policy-politique/initiatives/tcps2-eptc2/chapter9-chapitre9/>].
34. First Nations Information Governance Centre (FNIGC). The First Nations principles of OCAP® 2017 [Available from: <http://fnigc.ca/ocap.html>].
35. Canadian Institutes of Health Research (CIHR). CIHR guidelines for health research involving Aboriginal People. 2007 [Available from: <http://www.cihr-irsc.gc.ca/e/29134.html>].
36. Petkovic, Welch V, Jull J, Petticrew M, Kristjansson E, Radar T, et al. How is health equity reported and analyzed in randomised trials: Cochrane Systematic Review Registered Protocol. Cochrane Methodology Review Group. 2017(Issue 8 . Art. No.: MR000046).
37. Mbuagbaw L, Aves T, Shea B, Jull J, Welch V, Taljaard M, et al. Considerations and guidance in designing equity-relevant clinical trials. *Int J Equity Health*. 2017;16(1):93.
38. Simera I, Moher D, Hirst A, Hoey J, Schulz KF, Altman DG. Transparent and accurate reporting increases reliability, utility, and impact of your research: reporting guidelines and the EQUATOR Network. *BMC Med*. 2010;8:24.
39. Armstrong MJ, Mullins CD, Gronseth GS, Gagliardi AR. Recommendations for patient engagement in guideline development panels: A qualitative focus group study of guideline-naïve patients. *PLoS One*. 2017;12(3):e0174329.
40. West JF. Public health program planning logic model for community engaged type 2 diabetes management and prevention. *Eval Program Plann*. 2014;42:43-9.
41. James S, Arniella G, Bickell NA, Walker W, Robinson V, Taylor B, et al. Community ACTION boards: an innovative model for effective community-academic research partnerships. *Prog Community Health Partnersh*. 2011;5(4):399-404.
42. May M, Law J. CBPR as community health intervention: institutionalizing CBPR within community based organizations. *Prog Community Health Partnersh*. 2008;2(2):145-55.
43. Johnson DS, Bush MT, Brandzel S, Wernli KJ. The patient voice in research-evolution of a role. *Res Involv Engagem*. 2016;2:6.

- 1  
2  
3 44. Jinks C, Carter P, Rhodes C, Taylor R, Beech R, Dziedzic K, et al. Patient and public  
4 involvement in primary care research - an example of ensuring its sustainability. *Res Involv*  
5 *Engagem.* 2016;2:1.  
6  
7 45. Arnstein S. A ladder of citizen participation. *JAm Plann Assoc.* 1969;35(4):216–24.  
8 46. National Institute of Health Research. INVOLVE 2001 [Available from:  
9 <https://www.invo.org.uk/>].  
10 47. Sheridan S, Schrandt S, Forsythe L, Hilliard TS, Paez KA, panel) Advisory Panel on  
11 Patient Engagement. The PCORI Engagement Rubric: Promising Practices for Partnering in  
12 Research. *Ann Fam Med.* 2017;15(2):165-70.  
13 48. Forsythe LP, Ellis LE, Edmundson L, Sabharwal R, Rein A, Konopka K, et al. Patient  
14 and stakeholder engagement in the PCORI pilot projects: description and lessons learned. *J Gen*  
15 *Intern Med.* 2016;31.  
16  
17  
18  
19  
20  
21  
22  
23  
24  
25  
26  
27  
28  
29  
30  
31  
32  
33  
34  
35  
36  
37  
38  
39  
40  
41  
42  
43  
44  
45  
46  
47  
48  
49  
50  
51  
52  
53  
54  
55  
56  
57  
58  
59  
60

1  
2  
3  
4  
5  
6  
7  
8  
9  
10  
11  
12  
13  
14  
15  
16  
17  
18  
19  
20  
21  
22  
23  
24  
25  
26  
27  
28  
29  
30  
31  
32  
33  
34  
35  
36  
37  
38  
39  
40  
41  
42  
43  
44  
45  
46  
47  
48  
49  
50  
51  
52  
53  
54  
55  
56  
57  
58  
59  
60

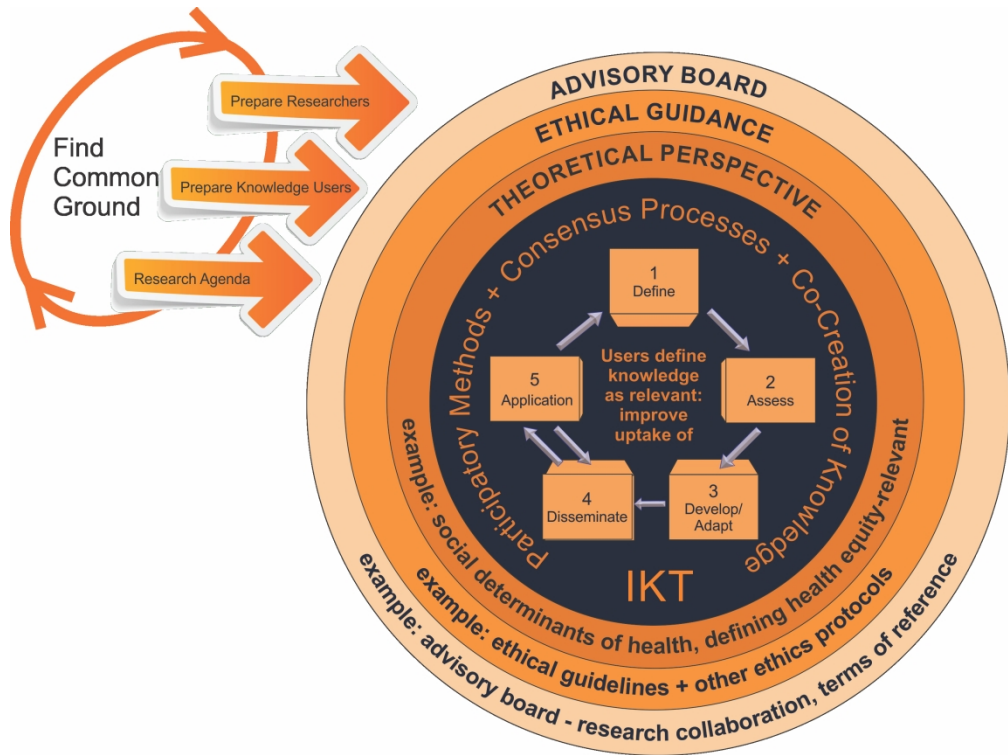

Figure 1.
